# Supplementary material for: Identification of the Main Active Components and Mechanism of Wang Bi Tablet in Treating Rheumatoid Arthritis Based on Integrative Pharmacology
Source: Front Pharmacol. 2021 Jun 4;12:669551. doi: 10.3389/fphar.2021.669551 (PMC8213436; doi:10.3389/fphar.2021.669551)
Supplement: Supplementary file 5 [file Table4.XLSX]

## Sheet: FF
Item Name	Item Type	IUPAC name	Description		ccs	rccs	Synonym "Chinese Name"	Synonym "Drug Bank"	Synonym "ChemSpider"	Category	Synonym "CAS number"	Item Tag "Waters Screening Library/Pesticide"	Item Tag "Waters Screening Library/Veterinary Drug"	Item Tag "Waters Screening Library/Mycotoxin"	Formula	Structure	Retention Time	F1	F2	F3	F4	F5	DriftTime	Comment
3'-O-Acetylhamaudol							3'-O-乙酰基亥茅酚			色原酮					C17H18O6	FF-001.mol
3'-O-angeloylhamaudol							3'-O-当归酰基亥茅酚			色原酮					C20H22O6	FF-002.mol
hamaudol							亥茅酚			色原酮	735-46-6				C15H16O5	FF-003.mol
sec-o-glucosylhamaudol							亥茅酚苷			色原酮	80681-44-3				C21H26O10	FF-004.mol
5-O-Methylvisammioside							5-O-甲基维斯阿米醇			色原酮	84272-85-5				C22H28O10	FF-005.mol
Ledebouriellol							防风色酮醇			色原酮	84272-83-3				C20H22O7	FF-006.mol
cimifugin							升麻精			色原酮	37921-38-3				C16H18O6	FF-007.mol
4'-O-β-Glucopyranosyl-5-O-methylvisamminol							4'-O-β-吡喃葡萄糖基-5-O-甲基齿阿米醇			色原酮	84272-85-5				C22H28O10	FF-008.mol
Prim-O-glucosylcimifugin							伯-O-葡萄糖升麻素苷			色原酮	80681-45-4				C22H28O11	FF-009.mol
Wogonin							汉黄芩素			色原酮	632-85-9				C16H12O5	FF-010.mol
UndulatosideA										色原酮	58108-99-9				C16H18O9	FF-011.mol
Divaricatol										色原酮					C17H18O7	FF-012.mol
xanthotoxin / 8-methoxypsoralen							8-甲氧基补骨脂素 / 花椒毒素			香豆素类化合物	298-81-7				C12H8O4	FF-013.mol
Bergapten							香柑内酯			香豆素类化合物	484-20-8				C12H8O4	FF-014.mol
Isobergapten										香豆素类化合物	482-48-4				C12H8O4	FF-015.mol
Imperatorin							欧前胡素			香豆素类化合物	482-44-0				C16H14O4	FF-016.mol
Isoimperatorin							异欧前胡素			香豆素类化合物	482-45-1				C16H14O4	FF-017.mol
Phellopterin							珊瑚菜素			香豆素类化合物	2543-94-4				C17H16O5	FF-018.mol
fraxidin							秦皮啶			香豆素类化合物					C11H10O5	FF-019.mol
isofraxidin							异秦皮啶			香豆素类化合物	486-21-5				C11H10O5	FF-020.mol
scopoletin							东莨菪素			香豆素类化合物	92-61-5				C10H8O4	FF-021.mol
Deltoin							石防风素			香豆素类化合物	19662-71-6				C19H20O5	FF-022.mol
(3'S)-Hydroxydeltoin							(3′S)-羟基-石防风素			香豆素类化合物					C17H16O6	FF-023.mol
marmesin							异紫花前胡苷			香豆素类化合物	13849-08-6				C14H14O4	FF-024.mol
7-Hydroxycoumarin							伞形花内酯			香豆素类化合物	93-35-6				C9H6O3	FF-025.mol
norcimifugin										香豆素类化合物	49624-66-0				C15H16O6	FF-026.mol
isopimpinellin							异茴芹灵			香豆素类化合物	482-27-9				C13H10O5	FF-027.mol
psoralen							补骨脂素			香豆素类化合物	66-97-7				C11H6O3	FF-028.mol
praeruptorin B							白花前胡乙素			香豆素类化合物	81740-07-0				C24H26O7	FF-029.mol
(S)-angelicain										香豆素类化合物	49624-66-0				C15H16O6	FF-030.mol
3'-O-i-butyrylhamaudol										香豆素类化合物					C20H24O6	FF-031.mol
nodakenetin										香豆素类化合物	495-32-9				C14H14O4	FF-032.mol
praeruptorin H										香豆素类化合物					C24H30O7	FF-033.mol
peuarenarine										香豆素类化合物	37975-60-3				C24H26O8	FF-034.mol
cnidimoide A										香豆素类化合物					C21H26O10	FF-035.mol
(3S)-2,2-dimethyl-3,5-dihydroxy-8-hydroxymethyl-3,4-dihydro-2H,6H-benzo[1,2-b:5,4-b']dipyran-6-on										香豆素类化合物					C15H16O6	FF-036.mol
glycerol monolinoleate							亚油酸三甘酯			脂肪酸	3443-82-1				C21H38O4	FF-037.mol
virol C										脂肪酸					C17H26O2	FF-038.mol
glycerol monooleate							甘油单油酸酯			甘油酯 类	111-03-5				C21H40O4	FF-039.mol
β-sitosterol							β-谷甾醇			三萜	83-46-5				C29H50O	FF-040.mol
D-mannitol							D-甘露醇				69-65-8				C6H14O6	FF-041.mol
5-hydroxy-8-methoxypsoralen							5-羟基-8-甲氧基 补骨脂素				7471-73-0				C12H8O5	FF-042.mol
tectochrysin							杨芽黄素				520-28-5				C16H12O4	FF-043.mol
panaxynol/(R)-(-)-Falcarinol							人参炔醇/镰叶芹醇			挥发油	21852-80-2				C17H24O	FF-044.mol
α-pinene							α-蒎烯			挥发油	7785-70-8				C10H16	FF-045.mol
hexanal							己醛			挥发油	66-25-1				C6H12O	FF-046.mol
pentanol							戊醇			挥发油	71-41-0				C5H12O	FF-047.mol
hexanol							己醇			挥发油	111-27-3				C5H12O	FF-048.mol
octanal							辛醛			挥发油	124-13-0				C8H16O	FF-049.mol
nonanal							壬醛			挥发油	124-19-6				C9H18O	FF-050.mol
octanol							辛醇			挥发油	68603-15-6				C8H18O	FF-051.mol
octanoic Acid							辛酸			挥发油	124-07-2				C8H16O2	FF-052.mol
acetophenone							乙酰苯			挥发油	98-86-2				C8H8O	FF-053.mol
7-octen-4-ol							7-辛烯-4-醇			挥发油	53907-72-5				C8H16O	FF-054.mol
naphthalene							萘			挥发油	91-20-3				C10H8	FF-055.mol
octadecadienoic acid							十八烷二烯酸			挥发油	121250-47-3				C18H32O2	FF-056.mol
cyclohexene							环己烯			挥发油	110-83-8				C6H10	FF-057.mol
calacorene							菖蒲烯			挥发油	168398-95-6				C15H20	FF-058.mol
decenal							反式-2-癸醛			挥发油	3913-71-1				C10H18O	FF-059.mol
decadienal							葵二烯醛			挥发油	25152-84-5				C10H16O	FF-060.mol
Daucosterol							胡萝卜苷 (刺五加苷A)			苷	474-58-8				C35H60O6	FF-061.mol
adenosine							腺苷			生物碱	58-61-7				C10H13N5O4	FF-062.mol
METHYL MYRISTATE							十四烷酸甲酯			有机酸类	124-10-7				C15H30O2	FF-063.mol
METHYL PENTADECANOATE							十五烷酸甲酯			有机酸类	7132-64-1				C16H32O2	FF-064.mol
2-(E)-Nonenoic acid methyl ester							2-(E)-壬烯二酸甲酯			有机酸类	111-79-5				C10H18O2	FF-065.mol
10-undecenoic acid methyl ester							10-十一碳烯酸甲酯			有机酸类	111-81-9				C12H22O2	FF-066.mol
Methyl palmitate							十六烷酸甲酯			有机酸类	112-39-0				C17H34O2	FF-105.mol
9(Z),12(Z)-methyl octadecadienoate							9(Z),12(Z)-十八碳二烯酸甲酯			有机酸类	2462-85-3				C19H34O2	FF-067.mol
TRANS-11-OCTADECENOIC ACID METHYL ESTER							十八碳烯酸甲酯			有机酸类	6198-58-9				C19H36O2	FF-068.mol
vanillic acid							4-羟基-3-甲氧基苯甲酸			有机酸类	121-34-6				C8H8O4	FF-069.mol
cerotic acid							蜡酸			脂肪酸	506-46-7				C26H52O2	FF-070.mol
Fumaric acid							丁烯二酸			脂肪酸	110-17-8				C4H4O4	FF-071.mol
Cleomiscosin A							黄花菜木脂素A			木脂素	76948-72-6				C20H18O8	FF-072.mol
(3'S)-3'-O-β-D-apiofuranosyl-(1→6)-O-β-D-glucopyranosylhamaudol										色酮苷					C26H34O14	FF-073.mol
(2'S)-4'-O-β-D-apiofuranosyl-(1→6)-O-β-D-glucopyranosylvisamminol										色酮苷					C26H34O14	FF-074.mol
4'-O-β-D-glucopyranosylvisamminol										色酮苷					C21H26O10	FF-075.mol
D-Galactose							D-半乳糖			糖	59-23-4				C6H12O6	FF-076.mol
L(+)-Arabinose							L-阿拉伯糖			糖	87-72-9				C5H10O5	FF-077.mol
D-galacturonic acid							D-半乳糖醛酸			糖	91510-62-2				C6H12O8	FF-078.mol
D-Mannose							D-甘露糖			糖	3458-28-4				C6H12O6	FF-079.mol
L(+)-Rhamnose monohydrate							L-鼠李糖			糖	10030-85-0				C6H14O6	FF-080.mol
L-FUCOSE							岩藻糖			糖	2438-80-4				C6H12O5	FF-081.mol
D(+)-Glucose							葡萄糖			糖	50-99-7				C6H12O6	FF-082.mol
D-Ribose							核糖			糖	50-69-1				C5H10O5	FF-083.mol
Ostenol										香豆素类化合物	5928-25-6				C19H42N2O8S2	FF-084.mol
decursin							紫花前胡素			香豆素类化合物	5928-25-6				C19H20O5	FF-085.mol
Xanthotoxol							8－羟基补骨脂素			香豆素类化合物	2009-24-7				C11H6O4	FF-086.mol
divaricatacid										香豆素类化合物					C16H16O7	FF-087.mol
PENTACOSANOIC ACID							二十五烷酸			有机酸类	506-38-7				C25H50O2	FF-088.mol
Eleutherinoside B										香豆素类化合物					C28H36O15	FF-089.mol
Hesperidin							橙皮苷			香豆素类化合物	520-26-3				C28H34O15	FF-090.mol
Diosmin							地奥司明			香豆素类化合物	520-27-4				C28H32O15	FF-091.mol
Cnidimoside A										香豆素类化合物	155112-93-9				C21H26O10	FF-092.mol
3'-propionyl-4'-(2-methyl)butyrylkhellactone										香豆素类化合物					C22H26O7	FF-093.mol
3'-propionyl-4'-isovalerylkhellactone										香豆素类化合物					C22H26O7	FF-094.mol
Qianhucoumarin A										香豆素类化合物	150135-35-6				C19H20O6	FF-095.mol
Hyuganin D										香豆素类化合物	77331-76-1				C20H22O7	FF-096.mol
Praeruptorin A										香豆素类化合物	73069-27-9				C21H22O7	FF-097.mol
Peucedanocoumarin I										香豆素类化合物	130464-55-0				C21H24O7	FF-098.mol
Hyuganin C										香豆素类化合物					C21H24O7	FF-099.mol
Praeruptorin E										香豆素类化合物	78478-28-1				C24H28O7	FF-100.mol
Multivittan A										香豆素类化合物					C24H32O6	FF-101.mol
(+)-3'-decanoyl-cis-khellactone										香豆素类化合物					C24H32O6	FF-102.mol
(+)-4'-decanoyl-cis-khellactone										香豆素类化合物					C24H32O6	FF-103.mol
praeruptorin G										香豆素类化合物					C24H30O7	FF-104.mol

## Sheet: FZ
Item Name	Item Type	IUPAC name	Description		ccs	rccs	Synonym "Chinese Name"	Synonym "Drug Bank"	Synonym "ChemSpider"	Category	Synonym "CAS number"	Item Tag "Waters Screening Library/Pesticide"	Item Tag "Waters Screening Library/Veterinary Drug"	Item Tag "Waters Screening Library/Mycotoxin"	Formula	Structure	Adduct	Retention Time	F1	F2	F3	F4	F5	DriftTime	Comment
Aconitine	Compound						乌头碱			C-19 型二萜生物碱	302-27-2		Veterinary Drug		C34H47NO11	FZ-001.mol
Mesaconitine							中乌头碱			C-19 型二萜生物碱	2752-64-9				C33H45NO11	FZ-002.mol
Hypaconitine							次乌头碱			C-19 型二萜生物碱	6900-87-4				C33H45NO10	FZ-003.mol
Talatizamine							塔拉乌头胺			C-19 型二萜生物碱	20501-56-8				C24H39NO5	FZ-004.mol
Isotalatizidine							异塔拉定			C-19 型二萜生物碱	7633-68-3				C23H37NO5	FZ-005.mol
Karacoline							多根乌头碱			C-19 型二萜生物碱	39089-30-0				C22H35NO4	FZ-006.mol
Neoline							新乌宁碱			C-19 型二萜生物碱	466-26-2				C24H39NO6	FZ-007.mol
Fuziline							附子宁碱			C-19 型二萜生物碱	80665-72-1				C24H39NO7	FZ-008.mol
Isodelphinine							异飞燕草碱			C-19 型二萜生物碱	1357-96-6				C33H45NO9	FZ-009.mol
Benzoylmesaconine							苯甲酰美沙乌头原碱			C-19 型二萜生物碱	63238-67-5				C31H43NO10	FZ-010.mol
Lipoaconitine							脂乌头碱			C-19 型二萜生物碱	81941-14-2				C32H44NO9	FZ-011.mol
Lipomesaconitine							脂中乌头碱			C-19 型二萜生物碱					C31H42NO9	FZ-012.mol
Lipodeoxyaconitine							脂去氧乌头碱			C-19 型二萜生物碱	244190-83-8				C32H44NO8	FZ-013.mol
Monoacetyltalizamine										C-19 型二萜生物碱					C26H41NO6	FZ-014.mol
14-acetyltalatisamine							14-乙酰塔拉胺			C-19 型二萜生物碱	71239-55-9				C26H41NO6	FZ-015.mol
Senbusine A							森布星 A			C-19 型二萜生物碱	82202-95-7				C23H37NO6	FZ-016.mol
Senbusine B							森布星 B			C-19 型二萜生物碱	82202-95-9				C23H37NO6	FZ-017.mol
Senbusine C							森布星 C			C-19 型二萜生物碱					C24H39NO7	FZ-018.mol
Benzoylaconine							苯甲酰基乌头原碱			C-19 型二萜生物碱	466-24-0				C32H45NO10	FZ-019.mol
Benzoylhypaconine							苯甲酰海帕乌头原碱			C-19 型二萜生物碱	63238-66-4				C31H43NO9	FZ-020.mol
Aldohyaconitine										C-19 型二萜生物碱					C34H47NO11	FZ-021.mol
Neojiangyouaconitine							新江油乌头碱			C-19 型二萜生物碱	126266-35-1				C33H47NO9	FZ-022.mol
Deoxyaconitine							脱氧乌头碱			C-19 型二萜生物碱	3175-95-9				C34H47NO10	FZ-023.mol
14-O-cinnamoylneoline										C-19 型二萜生物碱					C34H49NO7	FZ-024.mol
14-O-anisoylneoline										C-19 型二萜生物碱					C33H49NO8	FZ-025.mol
14-O-veratroylneoline										C-19 型二萜生物碱					C34H51NO9	FZ-026.mol
Aconifine							10-羟基乌头碱			生物碱类					C34H47NO12	FZ-027.mol
Lipoforesaconitine										C-19 型二萜生物碱					C33H46NO7	FZ-028.mol
14-O-acetyneoline										C-19 型二萜生物碱					C26H41NO7	FZ-029.mol
Foresaconitine							黄草乌头丙			C-19 型二萜生物碱	73870-35-6				C35H49NO9	FZ-030.mol
Crassicauline A							粗茎乌头碱甲			C-19 型二萜生物碱	79592-91-9				C35H49NO10	FZ-031.mol
Lipoyunanaconitine										C-19 型二萜生物碱					C33H46NO9	FZ-032.mol
8-OEt-14-benzoylmesaconitine							苯甲酰中乌头碱			C-19 型二萜生物碱	63238-67-5				C31H43NO10	FZ-033.mol
Yunaconitine							滇乌头碱			C-19 型二萜生物碱	70578-24-4				C35H49NO11	FZ-034.mol
Chasmanine							展花乌头宁			C-19 型二萜生物碱	5066-78-4				C25H41NO6	FZ-035.mol
Foresticine							佛氏乌头辛			C-19 型二萜生物碱	91794-15-9				C24H39NO6	FZ-036.mol
N-deethylaconine										C-19 型二萜生物碱					C22H35NO6	FZ-037.mol
Hypaconine							次乌头原碱			C-19 型二萜生物碱	63238-68-6				C24H39NO8	FZ-038.mol
Mesaconine							新乌头原碱			C-19 型二萜生物碱	6792-09-2				C24H39NO9	FZ-039.mol
N-ethylhokbusine B										C-19 型二萜生物碱					C25H41NO5	FZ-040.mol
Oxonitine										C-19 型二萜生物碱	545-57-3				C33H43NO12	FZ-041.mol
Beiwutinine										C-19 型二萜生物碱					C23H37NO10	FZ-042.mol
Karakanine										C-19 型二萜生物碱					C22H33NO4	FZ-043.mol
Beiwutine							北乌碱			C-19 型二萜生物碱	50656-90-1				C33H45NO12	FZ-044.mol
Condelphine										C-19 型二萜生物碱	7633-69-4				C25H39NO6	FZ-045.mol
14-acetylkarakoline										C-19 型二萜生物碱					C24H37NO5	FZ-046.mol
Ignavine										C-20 型二萜生物碱	1357-76-2				C27H31NO5	FZ-047.mol
Delgradine										C-20 型二萜生物碱					C44H65NO12	FZ-048.mol
Acetyldelgraline										C-20 型二萜生物碱					C46H67NO13	FZ-049.mol
Hetisine										C-20 型二萜生物碱	10089-23-3				C20H27NO3	FZ-050.mol
(+)-(13R,19S)-1β,11α-diacetoxy-2α-benzoyloxy-13,19-dihydroxy-hctisan										C-20 型二萜生物碱					C32H39NO8	FZ-051.mol
(－)-(13R,19S)-11α,19-dihydroxy-N-methyl-l3-(S-2-methylbutyryloxy)-2α-propionyloxyhetisanium hy-droxide										C-20 型二萜生物碱					C30H46NO6+	FZ-052.mol
(－)-(13R,19S)-7β,11α,19-trihydroxy-N-rnethyl-l3-(S-2-methylbutyryloxy)-2α-propionyloxyhetisanium hy-droxide										C-20 型二萜生物碱					C30H46NO7+	FZ-053.mol
(+)-(13R,19S)-2α-isobutyryloxy-7β,11α,9-trihydroxy-N-methyl-l3-( S-2-methylbutyryloxy) hetisanium by droxide										C-20 型二萜生物碱					C31H48NO7+	FZ-054.mol
Songorine							准噶尔乌头碱			C-20 型二萜生物碱	509-24-0				C22H31NO3	FZ-055.mol
Songoramine							准噶尔乌头胺			C-20 型二萜生物碱	23179-78-4				C22H29NO3	FZ-056.mol
15-acetylsongoramine										C-20 型二萜生物碱					C31H41NO7	FZ-057.mol
12-epi-15-OAc-17-Bz-16-OH-16，17-dihydronapelline										C-20 型二萜生物碱					C32H45NO7	FZ-058.mol
12-epi-napelline							12-表-欧乌头碱			C-20 型二萜生物碱	110064-71-6				C22H33NO3	FZ-059.mol
Aconicarmine										C-20 型二萜生物碱					C22H35NO5	FZ-060.mol
Aconicarchamine B										C-20 型二萜生物碱					C32H43NO6	FZ-061.mol
Aconicarchamine A										C-20 型二萜生物碱					C22H35NO4	FZ-062.mol
salsolinol							去甲猪毛菜碱			生物碱	27740-96-1				C10H13NO2	FZ-063.mol
jesaconitine							杰斯乌头碱			生物碱	16298-90-1				C35H49NO12	FZ-064.mol
liquiritin							甘草苷			黄酮类	551-15-5				C21H22O9	FZ-065.mol
liquiritigenin							甘草素			黄酮类	578-86-9				C15H12O4	FZ-066.mol
isoliquiritigenin							异甘草素			黄酮类	961-29-5				C15H12O4	FZ-067.mol
gracillin							纤细薯蓣皂苷			黄酮类	19083-00-2				C45H72O17	FZ-068.mol
uracil							尿嘧啶				66-22-8				C4H4N2O2	FZ-069.mol
sesamin							芝麻素				607-80-7				C20H18O6	FZ-070.mol
episesamin							表芝麻素				133-05-1				C20H18O6	FZ-071.mol
isolariciresinol							异落叶松脂素				548-29-8				C20H24O6	FZ-072.mol
linoleic acid							亚油酸				60-33-3				C18H32O2	FZ-073.mol
yokonoside										生物碱	53823-12-4				C20H21NO11	FZ-074.mol
higenamine							去甲乌药碱			生物碱	5843-65-2				C16H17NO3	FZ-075.mol
coryneine chloride							棍掌碱氯化物			生物碱	13075-92-8				C11H18NO2	FZ-076.mol
fuzitine							附子亭			生物碱	142287-96-5				C20H25NO5	FZ-077.mol
aconicaramide										吡咯生物碱					C11H20N2O2	FZ-078.mol
5-hydroxymethylpyrrole-2-carbaldehyde										吡咯生物碱					C6H11NO2	FZ-079.mol
oleracein E							金莲花碱			吡咯生物碱	1021950-79-7				C12H13NO3	FZ-080.mol
(－)-(A-b)-8β-acetoxy-l4α-benzoyloxy-N-ethyl-13β,15α-dihydroxy-lα,6α,16β,18-tetramethoxyaconitane										C-19 型二萜生物碱					C34H47NO10	FZ-081.mol
(－)-(A-b)-14α-benzoyloxy-N-ethyl-8β,13β-dihydroxy-lα,6α,16β，18-tetramethoxyaconitane										C-19 型二萜生物碱					C32H45NO8	FZ-082.mol
(－)-(A-b)-14α-benzoyloxy-N-ethyl-3α,8β,13β,15α-tetrahydroxy-lα,6α,16β,18-tetramethoxyaconitane										C-19 型二萜生物碱					C32H45NO10	FZ-083.mol
(－)-(A-b)-8β,14α-dibenzoyloxy-N-ethyl-3α,13β,15ɑ-trihydroxy-lα,6α,16β,18-tetramethoxyaconitane										C-19 型二萜生物碱					C38H47NO11	FZ-084.mol
(－)-(A-b)-14α-benzoyloxy-N-ethyl-13β,15α-dihydroxy-lα,6α,8β,16β,18-pentamethoxyaconitane										C-19 型二萜生物碱					C33H47NO10	FZ-085.mol
(－)-(A-b)-14α-benzoyloxy-N-ethyl-8β,13β,15α-trihydroxy-lα,16β,18-trimethoxyaconitane										C-19 型二萜生物碱					C31H43NO8	FZ-086.mol
(－)-(A-b)-14α-benzoyloxy-N-ethyl-6α,15α-dihydroxy-1α，8β，16β,18-tetramethoxyaconitane										C-19 型二萜生物碱					C32H45NO8	FZ-087.mol
(－)-(A-b)-14α-benzoyloxy-N-ethyl-6α,8β,15α-trihydroxy-lα,16β,18-trimethoxyaconitane										C-19 型二萜生物碱					C31H43NO8	FZ-088.mol
(－)-(A-b)-14α-benzoyloxy-8β-ethoxy-N-ethyl-6α,15α-dihydroxy-lα,16β,8-trimethoxyaconitane										C-19 型二萜生物碱					C33H47NO8	FZ-089.mol
(－)-(A-b)-14α-benzoyloxy-N-ethyl-8β,15α-dihydroxy-lα,16β,18-trimet hoxyaconitane										C-19 型二萜生物碱					C31H43NO7	FZ-090.mol
(－)-(A-b)-14α-benzoyloxy-N-ethyl-1α,8β,15α-trihydroxy-16β,18-dimethoxyaconitane										C-19 型二萜生物碱					C31H43NO8	FZ-091.mol
(－)-(A-b)-14α-benzoyloxy-N-ethyl-1a,8β,15α-trihydroxy-6α,16β,18-trimethoxyaconitane										C-19 型二萜生物碱					C31H43NO8	FZ-092.mol
(－)-(A-b)-8β-acetoxy-14α-benzoyloxy-N-ethyl-15α-hydroxy-lα,6α,16β,18-tetramethoxyaconitane										C-19 型二萜生物碱					C34H47NO9	FZ-093.mol
(－)-(A-c)-8β-acetoxy-14α-benzoyloxy-N-ethyl-13β,15α-dihydroxy-lα,6α,16β,18-tetrame thoxy-19-oxoacoin-taneaconifine										C-19 型二萜生物碱					C36H51NO11	FZ-094.mol
(－)-(A-b)-14α-cinnamoyloxy-N-ethyl-lα,8β,15α-trihydroxy-6α,16β,18-trimethoxyaconitanebeiwutinine										C-19 型二萜生物碱					C33H45NO8	FZ-095.mol
(－)-( A-b)-8β-acetoxy-14α-benzoyloxy-N-ethyl-3α，10β，13β，15α-tetrahydroxy-lα，6α，16β，18-tetramethoxyaconitane										C-19 型二萜生物碱					C34H47NO12	FZ-096.mol
(－)-(A-b)-14α-benzoyloxy-3α,10β,13β,15α-tetrahydroxy-lα,6α,8β,16β,18-pentamethoxy-N-methylaconitane										C-19 型二萜生物碱					C32H45NO11	FZ-097.mol
(－)-(A-c)-14α-benzoyloxy-3α,10β,13β,15α-tetrahydroxy-lα,6α,8β,16β,18-pentamethoxy-N-methylaconitane										C-19 型二萜生物碱					C32H45NO11	FZ-098.mol
(－)-(A-b)-14α-benzoyloxy-N-ethyl-3α,10β,13β,15α-tetrahydroxy-lα,6α,8β,16β,18-pentamethoxyaconitane										C-19 型二萜生物碱					C33H47NO11	FZ-099.mol
(－)-(A-b)-14α-benzoyloxy-3α,8β,10β,13β,15α-pentahydroxy-lα,6α,16β,18-tetramethoxy-N-methylaconitane										C-19 型二萜生物碱					C31H43NO11	FZ-100.mol
(－)-(A-b)-8β-acetoxy-14α-benzoyloxy-N-ethyl-3α，10β，13β-trihydroxy-lα，6α，16β，18-tetramethoxyaconitane										C-19 型二萜生物碱					C34H47NO11	FZ-101.mol
(－)-(A-b)-8β-acetoxy-14α-benzoyloxy-10β,13β,15α-trihydroxy-lα,6α,16β,18-tetramethoxy-N-methylaconitane										C-19 型二萜生物碱					C33H45NO11	FZ-102.mol

## Sheet: GJ
Item Name	Item Type	IUPAC name	Description		ccs	rccs	Synonym "Chinese Name"	Synonym "Drug Bank"	Synonym "ChemSpider"	Category	Synonym "CAS number"	Item Tag "Waters Screening Library/Pesticide"	Item Tag "Waters Screening Library/Veterinary Drug"	Item Tag "Waters Screening Library/Mycotoxin"	Formula	Structure	Adduct	Retention Time	F1	F2	F3	F4	F5	DriftTime	Comment
Protocatechuic acid 4-O- (6′-O-protocatechuyl) -β-D-glucopyranoside							原儿茶酸-4-O-(6′-O-原儿茶酰基)-β-D-吡喃葡萄糖苷			酚酸及其苷类					C20H20O12	GJ-001.mol
resveratrol							白藜芦醇			酚酸及其苷类	501-36-0				C14H12O3	GJ-002.mol
p-Hydroxycinnamic acid							对羟基肉桂酸			酚酸及其苷类	501-98-4				C9H8O3	GJ-003.mol
p-hydroxycinnamic aldehyde							对羟基肉桂醛			酚酸及其苷类	194940-15-3				C9H8O2	GJ-004.mol
C-veratroylglycol							C-藜芦酰乙二醇			酚酸及其苷类	168293-10-5				C10H12O5	GJ-005.mol
4-methyl-1,2-dihydroxybenzene							4-甲基邻苯二酚			酚酸及其苷类	452-86-8				C7H8O2	GJ-006.mol
protocatechualdehyde							原儿茶醛			酚酸及其苷类	139-85-5				C7H6O3	GJ-007.mol
p-hydroxybenzoic acid							对羟基苯甲酸			酚酸及其苷类	202-804-9				C7H6O3	GJ-008.mol
caffeic acid							咖啡酸			酚酸及其苷类	331-39-5				C9H8O4	GJ-009.mol
aspidinol							绵马酚			芳香族化合物	519-40-4				C12H16O4	GJ-010.mol
vanillin							香草醛			芳香族化合物	121-33-5				C8H8O3	GJ-011.mol
syringetin							丁香醛			芳香族化合物	4423-37-4				C17H14O8	GJ-012.mol
4-Hydroxybenzoic acid							对羟基苯甲酸			芳香族化合物	99-96-7				C9H10O3	GJ-013.mol
apocynin							香荚兰乙酮			芳香族化合物	498-02-2				C9H10O3	GJ-014.mol
3,4-Dihydroxybenzoic acid							原儿茶酸			芳香族化合物	99-50-3				C7H6O4	GJ-015.mol
Onitin							金粉蕨亭			芳香族化合物蕨素	53823-02-2				C15H20O3	GJ-016.mol
pyromeconic acid							去甲基麦芽酚			芳香族化合物	496-63-9				C5H4O3	GJ-017.mol
Maltol							麦芽酚			芳香族化合物	118-71-8				C6H6O3	GJ-018.mol
kojic acid							kojic acid			芳香族化合物	501-30-4				C6H6O4	GJ-019.mol
5-hydroxytryptophan							5-羟基麦芽酚			芳香族化合物	56-69-9				C11H12N2O3	GJ-020.mol
(3R)-des-O-methyl-lasiodiplodin							(3R)-去-O-甲基毛狄泼老素			芳香族化合物					C16H22O4	GJ-021.mol
Onitin-2'-O-β-D-glucoside							金粉蕨素-2'-O-β-D-葡萄糖苷			芳香族化合物蕨素					C21H30O8	GJ-022.mol
pterosin R							蕨素 R			芳香族化合物蕨素	76947-56-3				C15H19ClO3	GJ-023.mol
pterosin Y							蕨素 Y			芳香族化合物蕨素					C14H18O3	GJ-024.mol
isohistopterosin A							异组织蕨素 A			芳香族化合物蕨素					C14H16O4	GJ-025.mol
5-hydroxymethylfurfural							5-羟甲基糠醛			芳香族化合物	170678-36-1				C7H8O3	GJ-026.mol
Kaempferol							山柰酚			黄酮类化合物	520-18-3				C15H10O6	GJ-027.mol
Formononetin							芒柄花黄素			黄酮类化合物	485-72-3				C16H12O4	GJ-028.mol
Astragaloside IV							黄芪苷 IV			皂苷类化合物	84687-43-4				C41H68O14	GJ-029.mol
Digoxigenin							异羟基洋地黄毒苷元			皂苷类化合物	1672-46-4				C23H34O5	GJ-030.mol
Primeverin							樱草甘			皂苷类化合物	154-60-9				C20H28O13	GJ-031.mol
cibotibaromeside							金毛狗脊苷			黄酮类化合物					C15H20O9	GJ-032.mol
D-Aspartatic acid							天冬氨酸			氨基酸类化合物					C4H7NO4	GJ-033.mol
L-Glutamic acid							谷氨酸			氨基酸类化合物	56-86-0				C5H9NO4	GJ-034.mol
Proline							脯氨酸			氨基酸类化合物	29795-82-2				C5H9NO2	GJ-035.mol
oleic acid							油酸			挥发油类化合物	112-80-1				C18H34O2 or C8H17CH=CH(CH2)7COOH	GJ-036.mol
linoleic acid							亚油酸			挥发油类化合物	60-33-3				C18H32O2	GJ-037.mol
Palmitic acid							棕榈酸			挥发油类化合物					C16H32O2	GJ-038.mol
pentadecanoic acid							十五碳酸			挥发油类化合物	1002-84-2				C15H30O2	GJ-039.mol
methyl hexadeca-4,7,10-trienoate							十六碳三烯酸甲酯			挥发油类化合物	17364-31-7				C17H28O2	GJ-040.mol
Methyl lineoleate							亚油酸甲酯			挥发油类化合物	68605-14-1				C19H34O2	GJ-041.mol
γ-terpinene							γ-松油烯			挥发油类化合物	99-85-4				C10H16	GJ-042.mol
Sabinen							桧烯			挥发油类化合物	3387-41-5				C10H16	GJ-043.mol
Piperitone							胡椒酮			挥发油类化合物	89-81-6				C10H16O	GJ-044.mol
Cadina -1(10)4-diene							杜松二烯			挥发油类化合物	483-76-1				C15H24	GJ-045.mol
2-hexadecenoic acid							十六碳烯酸			挥发油类化合物	629-56-1				C16H30O2	GJ-046.mol
(±)-4-terpineol							4-松油醇			挥发油类化合物	562-74-3				C10H18O	GJ-047.mol
Phthalic acid							邻苯二甲酸			挥发油类化合物	88-99-3				C8H6O4	GJ-048.mol
Palmitic acid ethyl ester							棕榈酸乙酯			挥发油类化合物	628-97-7				C18H36O2	GJ-049.mol
Ethyl 9-hexadecenoate							十六碳烯酸乙酯			挥发油类化合物	54546-22-4				C18H34O2	GJ-050.mol
Oleic acid ethyl ester							油酸乙酯			挥发油类化合物	111-62-6				C20H38O2	GJ-051.mol
Linoleic acid ethyl ester							亚油酸乙酯			挥发油类化合物	544-35-4				C20H36O2	GJ-052.mol
Hexadecanoic acid							十六碳酸			挥发油类化合物					C16H32O2	GJ-053.mol
(E)-9-Octadecenoic acid							异油酸			挥发油类化合物	112-79-8				C18H34O2	GJ-054.mol
Linolenic acid methyl ester							亚油酸甲酯			挥发油类化合物	301-00-8				C19H32O2	GJ-055.mol
24-Methylenecycloartanol							24-亚甲基环木菠萝烷醇			萜类	1449-09-8				C31H52O	GJ-056.mol
β-Sitosterol							β-谷甾醇			萜类	83-46-5				C29H50O	GJ-057.mol
Daucosterol							胡萝卜苷			萜类	474-58-8				C35H60O6	GJ-058.mol
Lecithin							磷脂酰胆碱			萜类	8002-43-5				C42H80NO8P	GJ-059.mol
Paracetamol							对羟 基乙酰苯胺			萜类	103-90-2				C8H9NO2	GJ-060.mol
Onitisin 2'-O-glucoside							金粉蕨辛 2'-O-葡萄糖甙			萜类	62043-53-2				C21H30O9	GJ-061.mol
Onitin 2'-O-glucoside							金粉蕨亭 2'-O-葡萄糖甙			萜类	76947-60-9				C21H30O8	GJ-062.mol
lactose monohydrate							蔗糖			糖类	5989-81-1				C12H24O12	GJ-063.mol
(24R)-stigmast-4-ene-3-one							(24R)-豆甾-4-烯-3-酮			甾酮					C29H48O	GJ-064.mol
alternariol							交链抱霉酚			香豆素类	641-38-3				C14H10O5	GJ-065.mol
Flufenacet							氟噻草胺			生物碱	142459-58-3				C14H13F4N3O2S	GJ-066.mol
Aprindine							安搏律定			生物碱	37640-71-4				C22H30N2	GJ-067.mol
Allocryptopine							别隐品碱			生物碱	485-91-6				C21H23NO5	GJ-068.mol
Boldine							波尔丁			生物碱	476-70-0				C19H21NO4	GJ-069.mol
CHOLORAMPHENICOL							牛磺胆酸			生物碱					C11H12Cl2N2O5	GJ-070.mol
Acetochlor							乙草胺			生物碱	34256-82-1				C14H20ClNO2	GJ-071.mol
Midazolam							咪达唑仑			生物碱	59467-64-0				C18H13ClFN3	GJ-072.mol
Indalpine							吲达品			生物碱	63758-79-2				C15H20N2	GJ-073.mol
Lauric acid							月桂酸			生物碱	143-07-7				C12H24O2	GJ-074.mol
Ponasterone A							坡那甾酮A			苷	13408-56-5				C27H44O6	GJ-075.mol
Kaempferol-3-O-α-L-rhamnosyl-7-O-α-L-rhamnoside							山柰酚-3-O-α-L-鼠李糖基-7-O-α-L-鼠李糖苷			苷					C27H30O14	GJ-076.mol
Kaempferol-3-O-α-L- (4-O-acetyl) rhamnosyl-7-O-α-L-rhamnoside							山柰酚-3-O-α-L-(4-O-乙酰基)鼠李糖基-7-O-α-L-鼠李糖苷			苷					C29H32O15	GJ-077.mol
1,3,6,7-tetrahydroxy-C-glucosylxanthones										苷					C19H18O11	GJ-078.mol
Canine spinic acid							狗脊蕨酸			三萜					C30H48O3	GJ-079.mol
Woodorien							狗脊蕨素			苷					C14H18O9	GJ-080.mol
Woodwardinoside															C54H89O24	GJ-081.mol
(-)-epicatechin							表儿茶素				35323-91-2				C15H14O6	GJ-082.mol
(+)-catechin							儿茶精				154-23-4				C15H14O6	GJ-083.mol
cycloartenol							环阿屯醇			三萜	469-38-5				C30H50O	GJ-084.mol
ursolic acid							熊果酸			三萜	77-52-1				C30H48O3	GJ-085.mol
uraol										三萜					C30H50O2	GJ-086.mol
ecdysterone							蜕皮激素				5289-74-7				C27H44O7	GJ-087.mol
pterosterone											18089-44-6				C27H44O7	GJ-088.mol
Onychin							金粉蕨素				58787-04-5				C13H9NO	GJ-089.mol
1-Hexadecanol							正十六烷醇				36653-82-4				C16H34O	GJ-090.mol
n-butyl-β-D-fructopyranoside							正丁基-O-β-D-吡喃果糖苷				67884-27-9				C10H20O6	GJ-091.mol
butyl fructofuranoside							正丁基-O-β-D-呋喃果糖苷				80971-60-4				C10H20O6	GJ-092.mol
diploptene							何帕烯			三萜	1615-91-4				C30H50	GJ-093.mol
Cholest-5-enol															C27H46O	GJ-094.mol
shinbarometin															C36H64O11	GJ-095.mol
16-Hydroxyhexadecanoic Acid							16-OH-十六碳酸				506-13-8				C16H32O3	GJ-096.mol
dimethylesculetin							二甲基秦皮乙素			香豆素	120-08-1				C11H10O4	GJ-097.mol
ptaquiloside							欧蕨伊鲁苷				87625-62-5				C20H30O8	GJ-098.mol
Hesperidin							橙皮苷				520-26-3				C28H34O15	GJ-099.mol
L-Histidine							组氨酸				71-00-1				C6H9N3O2	GJ-100.mol

## Sheet: SCJ
Item Name	Item Type	IUPAC name	Description		ccs	rccs	Synonym "Chinese Name"	Synonym "Drug Bank"	Synonym "ChemSpider"	Category	Synonym "CAS number"	Item Tag "Waters Screening Library/Pesticide"	Item Tag "Waters Screening Library/Veterinary Drug"	Item Tag "Waters Screening Library/Mycotoxin"	Formula	Structure	Adduct	Retention Time	F1	F2	F3	F4	F5	DriftTime	Comment
lycopodine							石松碱			Lycopodine 型生物碱	466-61-5				C16H25NO	SJC-001.mol
8β-acetoxy-12β-hydroxy-lycopodine										Lycopodine 型生物碱					C18H27NO4	SJC-002.mol
8β-acetoxy-11α-hydroxy-lycopodine										Lycopodine 型生物碱					C18H27NO4	SJC-003.mol
lycoposerramine M										Lycopodine 型生物碱					C16H25NO2	SJC-004.mol
acetylfawcettiine										Lycopodine 型生物碱					C20H31NO4	SJC-005.mol
clavolonine							棒石松宁碱			Lycopodine 型生物碱					C16H25NO2	SJC-006.mol
α-lofoline										Lycopodine 型生物碱					C18H29NO3	SJC-007.mol
6α,8β-dihydroxylycopodine							6α,8β-二氢石松碱			Lycopodine 型生物碱					C16H25NO3	SJC-008.mol
4α,8β-dihydroxylycopodine							4α,8β-二氢石松碱			Lycopodine 型生物碱					C16H25NO3	SJC-009.mol
8β-hydroxylycodoline										Lycopodine 型生物碱					C16H25NO3	SJC-010.mol
4α,8β,12β-trihydroxylycopodine										Lycopodine 型生物碱					C16H25NO4	SJC-011.mol
8β-hydroxy-11α-acetoxylycopodine										Lycopodine 型生物碱					C18H27NO4	SJC-012.mol
11β-hydroxy-12-epilycodoline										Lycopodine 型生物碱					C16H25NO3	SJC-013.mol
11α-hydroxy-acetylfawcettine										Lycopodine 型生物碱					C20H31NO5	SJC-014.mol
acetyllycofawcine										Lycopodine 型生物碱					C20H31NO5	SJC-015.mol
lycoposerramine G										Lycopodine 型生物碱					C16H25NO3	SJC-016.mol
deacetylfawcettiine										Lycopodine 型生物碱					C16H27NO2	SJC-017.mol
fawcettiine							法西亭碱/法氏石松定碱			Lycopodine 型生物碱					C18H29NO3	SJC-018.mol
lycofawcine										Lycopodine 型生物碱	3175-90-4				C18H29NO4	SJC-019.mol
8β-hydroxylycoposerramine K										Lycopodine 型生物碱					C16H23NO3	SJC-020.mol
anhydrolycodoline										Lycopodine 型生物碱					C16H23NO	SJC-021.mol
miyoshianine C										Lycopodine 型生物碱	1092370-80-3				C16H25NO4	SJC-022.mol
miyoshianine A										Lycopodine 型生物碱					C16H25NO3	SJC-023.mol
lycodoline							石松灵碱			Lycopodine 型生物碱	6900-92-1				C16H25NO2	SJC-024.mol
huperzine E							石杉碱 E			Lycopodine 型生物碱					C16H21NO2	SJC-025.mol
lucidioline										Lycopodine 型生物碱					C16H25NO2	SJC-026.mol
8β-hydroxyhuperzine E										Lycopodine 型生物碱					C16H21NO3	SJC-027.mol
lycodine							石松定碱			Lycodine 型生物碱	20316-18-1				C16H22N2	SJC-028.mol
α-obscurine							α-玉柏碱			Lycodine 型生物碱					C17H26N2O	SJC-029.mol
desN-methyl-α-obscurine										Lycodine 型生物碱					C16H24N2O	SJC-030.mol
lycojapodine A										Fawcettimine 型生物碱					C16H23NO3	SJC-031.mol
obscurinine										Fawcettimine 型生物碱					C18H26N2O	SJC-032.mol
lycopoclavamine-A										Fawcettimine 型生物碱					C16H23NO2	SJC-033.mol
fawcettimine							法西亭明碱			Fawcettimine 型生物碱	15228-74-7				C16H25NO2	SJC-034.mol
lycoflexine										Fawcettimine 型生物碱	52485-00-4				C17H25NO2	SJC-035.mol
6-hydroxyl-6,7-dehydrolycoflexine										Fawcettimine 型生物碱					C17H23NO3	SJC-036.mol
6-hydroxyl-6,7-dehydro-8-deoxy-13-dehydroserratinine										Fawcettimine 型生物碱					C16H21NO3	SJC-037.mol
14,15-dehydrolycoflexine										Fawcettimine 型生物碱					C17H23NO2	SJC-038.mol
(15R)-14,15-dihydroepilobscurinol										Fawcettimine 型生物碱					C17H27NO2	SJC-039.mol
palhinine A										Fawcettimine 型生物碱					C17H25NO3	SJC-040.mol
palhinine B										Fawcettimine 型生物碱					C16H23NO3	SJC-041.mol
8-deoxy-13-dehydroserratinine										Fawcettimine 型生物碱	14478-54-7				C16H23NO2	SJC-042.mol
lycojaponicumin A										Fawcettimine 型生物碱					C16H21NO4	SJC-043.mol
lycojaponicumin B										Fawcettimine 型生物碱					C16H23NO4	SJC-044.mol
lycojaponicumin C										Fawcettimine 型生物碱					C17H23NO2	SJC-045.mol
cermizine C										生物碱					C11H21N	SJC-046.mol
senepodines G										生物碱					C11H20N+	SJC-047.mol
senepodines H										生物碱					C15H28N+	SJC-048.mol
(3β,8β,14α,21α)-26,27-dinoronocerane-3,8,14,21-tetrol										三萜类					C29H52O4	SJC-049.mol
(3β,8β,14α,21β)-26,27-dinoronocerane-3,8,14,21-tetrol										三萜类					C29H52O4	SJC-050.mol
lycopodiin A										三萜类					C30H50O4	SJC-051.mol
lycoclavanol							石松三醇			三萜类	13956-51-9				C30H50O3	SJC-052.mol
lycoclaninol										三萜类					C30H50O4	SJC-053.mol
α-onocerin							α-芒柄花萜醇			三萜类	511-01-3				C30H50O2	SJC-054.mol
3-epilycoclavanol										三萜类	24513-57-3				C30H50O3	SJC-055.mol
japonicumin A										三萜类					C30H50O4	SJC-056.mol
japonicumin B										三萜类					C30H48O5	SJC-057.mol
japonicumin C										三萜类					C30H52O5	SJC-058.mol
3R,21α,24-trihydroxyserrat-14-en-16-one										三萜类					C30H48O4	SJC-059.mol
serrat-14-ene-3β,21β-diol							千层塔-14-烯-3β,21β-二醇			三萜类	2239-24-9				C30H50O2	SJC-060.mol
serrat-14-ene-3β,21α-diol							千层塔-14-烯-3β,21α-二醇			三萜类					C30H50O2	SJC-061.mol
26-nor-8-oxo-α-onocerin										三萜类					C31H52O2	SJC-062.mol
16-oxo-3α-hydroxyserrat-14-en-21α-ol										三萜类					C32H52O3	SJC-063.mol
Daucosterol							β-胡萝卜苷			三萜类	474-58-8				C35H60O6	SJC-064.mol
Stigmasterol							豆甾醇			三萜类	83-48-7				C29H48O	SJC-065.mol
beta-Sitosterol							β-谷甾醇			三萜类	83-46-5				C29H50O	SJC-066.mol
3β,21β,24-trihydroxyserrat-14-ene										三萜类					C30H50O3	SJC-067.mol
phlegmaric acid										三萜类	35298-94-3				C30H48O4	SJC-068.mol
lycernuic acid A							垂石松酸 A			三萜类	53755-77-4				C30H48O4	SJC-069.mol
3,20β,21β,24-tetrahydroxyserrat-14-ene										三萜类					C30H50O4	SJC-070.mol
3α,21β,24-trihydroxyserrat-14-ene										三萜类					C30H50O3	SJC-071.mol
lycojaponicuminol A										三萜类					C30H48O3	SJC-072.mol
lycojaponicuminol B										三萜类					C31H52O2	SJC-073.mol
lycojaponicuminol C										三萜类	1651839-34-7				C29H48O4	SJC-074.mol
lycojaponicuminol D										三萜类					C39H56O5	SJC-075.mol
lycojaponicuminol E										三萜类					C39H56O5	SJC-076.mol
lycojaponicuminol F										三萜类					C33H54O4	SJC-077.mol
japonicumin D							伸筋草素 D			脂肪醇					C13H24O3	SJC-078.mol
1-Octacosanol							正二十八烷醇			脂肪醇	557-61-9				C28H58O	SJC-079.mol
Parietin							大黄素-5-甲醚			蒽醌类	521-61-9				C16H12O5	SJC-080.mol
Decanoic acid							癸酸			挥发油	334-48-5				C10H20O2	SJC-081.mol
β-Maaliene							β-马榄烯			挥发油	489-29-2				C15H24	SJC-082.mol
(-)-β-caryophyllene							反-石竹烯			挥发油	87-44-5				C15H24	SJC-083.mol
Calarene							白菖蒲油烯			挥发油	17334-55-3				C15H24	SJC-084.mol
α-gurjunene							α-古芸烯			挥发油	489-40-7				C15H24	SJC-085.mol
α-curcumene							α-姜黄烯			挥发油	644-30-4				C15H22	SJC-086.mol
α-selinene							α-蛇床烯			挥发油	473-13-2				C15H24	SJC-087.mol
d-Cadinene							D-杜松烯			挥发油	483-76-1				C15H24	SJC-088.mol
Centarol							α-雪松醇			挥发油	57308-24-4				C15H26O2	SJC-089.mol
Carvacrol							2-甲基-5-异丙基苯酚			挥发油	499-75-2				C10H14O	SJC-090.mol
Octadecane							正十八烷			挥发油	593-45-3				C18H38	SJC-091.mol
Eicoasne							二十烷			挥发油	112-95-8				C20H42	SJC-092.mol
Palmitic acid							十六烷酸			挥发油	57-10-3				C16H32O2	SJC-093.mol
9,12-octadecadienoicacid							9,12- 十八烷二烯酸/ 亚油酸			挥发油	60-33-3				C18H32O2	SJC-094.mol
Dibutyl phthalate							1,2-邻苯二甲酸二丁酯			挥发油	84-74-2				C16H22O4	SJC-095.mol
Vanillic acid							香荚兰酸			蒽醌类	121-34-6				C8H8O4	SJC-096.mol
Ferulic Acid							阿魏酸			蒽醌类	1135-24-6				C10H10O4	SJC-097.mol
Azelaic acid							杜鹃花酸			蒽醌类	123-99-9				C9H16O4	SJC-098.mol
Emodin							大黄素			蒽醌类	518-82-1				C15H10O5	SJC-099.mol
Anthraglycoside A							大黄素-6-甲醚-8-β-D-葡萄糖甙			蒽醌类					C22H22O10	SJC-100.mol
Anthraglycoside B							大黄素-8-β-D-葡萄糖甙			蒽醌类	23313-21-5				C21H20O10	SJC-101.mol

## Sheet: ZJC
Item Name	Item Type	IUPAC name	Description		ccs	rccs	Synonym "Chinese Name"	Synonym "Drug Bank"	Synonym "ChemSpider"		Synonym "CAS number"	Item Tag "Waters Screening Library/Pesticide"	Item Tag "Waters Screening Library/Veterinary Drug"	Item Tag "Waters Screening Library/Mycotoxin"	Formula	Structure	Adduct	Retention Time	F1	F2	F3	F4	F5	DriftTime	Comment
2-carboxyl,3-hydroxyl-norlupA(1)-20(29)-en-28-oicacid															C30H46O5	ZJC-001.mol
zizyberanalicacid															C30H46O4	ZJC-002.mol
Echinocystic acid							刺囊酸				510-30-5				C30H48O4	ZJC-003.mol
Gleditsia saponin C							皂荚皂苷C								C94H148O43	ZJC-004.mol
Gleditsiosides A															C78H124O35	ZJC-005.mol
Gleditsiosides D															C84H134O41	ZJC-006.mol
Gleditsiosides F															C94H148O42	ZJC-007.mol
Gleditsiosides G															C94H148O42	ZJC-008.mol
glespinoside A							皂刺皂苷 A								C79H126O37	ZJC-009.mol
D:C-friedours-7-en-3-one							DC-friedours-7-en-3-one								C30H48O	ZJC-010.mol
stigmast-4-ene-3,6-dione							豆甾-4-烯-3,6-二酮				57458-57-8				C29H46O2	ZJC-011.mol
stigmast-3,6-dione							豆甾烷-3,6-二酮								C29H48O2	ZJC-012.mol
stigmasterol							植物甾醇				83-48-7				C29H48O	ZJC-013.mol
β-sitosterol							β-谷甾醇				5779-62-4				C29H50O	ZJC-014.mol
betulicacid							白桦脂酸				472-15-1				C31H50O3	ZJC-015.mol
alphitolicacid							麦珠子酸				19533-92-7				C30H48O4	ZJC-016.mol
3-O-trans-p-coumaroylalphitolic acid															C39H54O6	ZJC-017.mol
2-hydroxypyracrenic acid															C39H54O7	ZJC-018.mol
3β-acetoxy-12-oleanolene-28-carboxylic acid							3β-乙酰氧基-12-齐墩果烯-28-羧酸				17990-42-0				C32H50O4	ZJC-019.mol
Friedelin							木栓酮				559-74-0				C30H50O	ZJC-020.mol
Betulin							白桦醇				473-98-3				C30H50O2	ZJC-021.mol
3β-O-trans-p-caffeoylalphitolic acid															C39H54O7	ZJC-022.mol
dihydrok-aempferol							香橙素				480-20-6				C15H12O6	ZJC-023.mol
quercetin							槲皮素				117-39-5				C15H10O7	ZJC-024.mol
ERIODICTYOL							圣草酚				552-58-9				C15H12O6	ZJC-025.mol
3,3',5',5,7-pentahydrofla-vanone							3,3',5',5,7-五氢黄酮								C15H12O7	ZJC-026.mol
(2R,3R)-5,3' ,4'-trimethoxyl-7-hydroxyl-flavanonol															C18H18O7	ZJC-027.mol
5,7,3',4'-tetrahydroxyl-flavanonol															C15H10O7	ZJC-028.mol
5-methoxyl-3',4',7-trihydroxylflavanonol															C16H14O7	ZJC-029.mol
epicatechin							表儿茶素				490-46-0				C15H14O6	ZJC-030.mol
5,7,3',5'-tetrahy-droxyl-flavanonol															C15H12O7	ZJC-031.mol
fustin							黄颜木素				20725-03-5				C15H12O6	ZJC-032.mol
(2R,3R)-7,3',5'-trihydrox-ylflavanonol															C15H12O6	ZJC-033.mol
(2R,3R)-5,7,3'-trihydroxyl-4'-methoxyl-flavanonol															C16H14O7	ZJC-034.mol
5,7,4'-trihydroxylflavone-8-C-glucopyranose															C21H20O11	ZJC-035.mol
2,7-dimethyl-xanthone															C15H12O2	ZJC-036.mol
fisetin							非瑟酮				528-48-3				C15H10O6	ZJC-037.mol
garbanzol							鹰嘴豆醇				1226-22-8				C15H12O5	ZJC-038.mol
leucorobinetinidin							白刺槐定				4382-45-0				C15H14O7	ZJC-039.mol
BUTEIN							紫铆查耳酮				487-52-5				C15H12O5	ZJC-040.mol
8-C-glucopyranosyl-3,4',7-trihydroxyflavone							8-C-葡萄糖基-3,4',7-三羟基黄酮								C21H20O11	ZJC-041.mol
(+)trans-2R,3R-3',4',5,7-tetrahydroxyflavanonol							(+)反-2R,3R-3',4',5,7- 四羟基二氢黄酮醇								C15H12O7	ZJC-042.mol
3-O-methylellagic acid-4'-(5''-acetyl)-α-L-arabinofuranoside							3-O-甲基鞣花酸-4'-(5''-乙酰基)-α-L-呋喃葡萄糖苷								C22H18O13	ZJC-043.mol
3-O-methylellagicacid-4'-O-α-L-rhamnopyranoside							3-O-甲基鞣花酸-4'-O-α-L-鼠李吡喃糖苷								C21H18O12	ZJC-044.mol
isovitexin							异牡荆素				29702-25-8				C21H20O10	ZJC-045.mol
ethyl gallate							没食子酸乙酯				831-61-8				C10H12O4	ZJC-046.mol
caffeic acid							咖啡酸				331-39-5				C10H10O3	ZJC-047.mol
3-O-trans-ferulylquinic acid							3-O-反式阿魏酰基奎宁酸								C10H10O4	ZJC-048.mol
apigenin							芹菜素				520-36-5				C15H10O5	ZJC-049.mol
Vanillic acid							香草酸				121-34-6				C8H8O4	ZJC-050.mol
trans-coniferyl aldehye							反式阿魏酸								C10H10O3	ZJC-051.mol
((E)-3,3'-dimethoxy-4,4'-dihydroxystilbene)							(E)-3,3'-二甲氧基-4,4'-二羟基-1,2-二苯乙烯								C16H16O4	ZJC-052.mol
3-O-caffeoylquinic acidethyl ester							3-O-咖啡酰奎宁酸乙酯								C18H22O9	ZJC-053.mol
4,4'-Dihydroxy-3,3'-dimethoxybenzophenone															C15H14O5	ZJC-054.mol
p-hydroxybenzoic acid							对羟基苯甲酸				99-96-7				C7H6O3	ZJC-055.mol
protocatechuic acid methyl							3,4-二羟基苯甲酸甲酯				2150-43-8				C8H8O4	ZJC-056.mol
protocatechuic aldehyde							3,4-二羟基苯甲醛				139-85-5				C7H6O3	ZJC-057.mol
syringic acid							丁香酸				530-57-4				C9H10O5	ZJC-058.mol
juglanin D							核桃素 D				5041-67-8				C20H18O10	ZJC-059.mol
C-veratroylglycol							C-藜芦酰乙二醇				168293-10-5				C10H12O5	ZJC-060.mol
(-)-syringaresinol							(-)-丁香脂素				1177-14-6				C22H26O8	ZJC-061.mol
cytochalasin H							细胞松弛素H				53760-19-3				C30H39NO2	ZJC-062.mol
2-Aminoimidazole							2-氨基咪唑				53760-19-3				C3H5N3	ZJC-063.mol
indole-3-carbaldehyde							3-吲哚甲醛				487-89-8				C9H7NO	ZJC-064.mol
Palmitic acid							棕榈酸								C16H32O2	ZJC-065.mol
scopoletin							东莨菪内酯				92-61-5				C10H8O4	ZJC-066.mol
3,4'-dihydroxypropiophenone							3,4-二羟基苯丙酮				7451-98-1				C9H10O3	ZJC-067.mol
dihydroferulic acid							磷酸异丙酯(单双酯混合物)				1135-23-5				C10H12O4	ZJC-068.mol
4-Aminobenzaldehyde							4-对氨基苯甲醛								C7H7ON	ZJC-069.mol
Erycibenin D															C16H14O6	ZJC-070.mol
erythro-and threo-Guaiacylglycerol-β-coniferyl aldehyde Ether															C20H22O7	ZJC-071.mol
3-O-methyl ellagic acid-4'-(6''-acetyl) -α-L-glucofuranoside							3-O-甲基鞣花酸-4'-(6''-乙酰基)-α-L-呋喃葡萄糖苷								C22H18O13	ZJC-072.mol
3-O-methyl ellagic acid-4'-O-α-L-rhamnoside							3-O-甲基鞣花酸-4'-O-α-L-鼠李吡喃糖苷								C21H18O12	ZJC-073.mol
3,4-Dihydroxybenzoic acid							原儿茶酸				99-50-3				C7H6O4	ZJC-074.mol
ELEUTHEROSIDE A							胡萝卜苷				474-58-8				C35H60O6	ZJC-075.mol
Scoparone							滨蒿内酯				120-08-1				C11H10O4	ZJC-076.mol
Isoscopoletin							异东莨菪内酯				776-86-3				C10H8O4	ZJC-077.mol
6-amino-7-methoxycoumarin							6-氨基-7-甲氧基香豆素								C10H9NO3	ZJC-078.mol
(+)-trans-2R,3R-3',4',5,7-tetrahydroxyflavanonol															C16H16O6	ZJC-079.mol
4-Hydroxybenzoic acid							对羟基苯甲酸				99-96-7				C7H6O3	ZJC-080.mol
Methyl 3,4-dihydroxybenzoate							原儿茶酸甲酯				2150-43-8				C8H8O4	ZJC-081.mol
Protocatechualdehyde							原儿茶醛				139-85-5				C7H6O3	ZJC-082.mol

## Sheet: ZM
Item Name	Item Type	IUPAC name	Description		ccs	rccs	Synonym "Chinese Name"	Synonym "Drug Bank"	Synonym "ChemSpider"	Category	Synonym "CAS number"	Item Tag "Waters Screening Library/Pesticide"	Item Tag "Waters Screening Library/Veterinary Drug"	Item Tag "Waters Screening Library/Mycotoxin"	Formula	Structure	Adduct	Retention Time	F1	F2	F3	F4	F5	DriftTime	Comment
(25S)-karatavioside C										Saponins					C56H92O29	ZM-001.mol
(E)-4'-demethyl-6-methyleucomin										Flavonoids					C17H14O5	ZM-002.mol
(L)-alpha-Terpineol							alpha-松油醇			Phenylpropanol and phenols	98-55-5				C10H18O	ZM-003.mol
12-O-Nicotinoylisolineolone										Alkaloid					C27H35NO6	ZM-004.mol
15OH-macrostemonoside J							15OH-薤白皂苷 J			Saponins					C45H76O21	ZM-005.mol
2,4'-dihydroxy-4-methoxybenzophenone										Phenylpropanol and phenols					C14H12O4	ZM-006.mol
2,6,4'-trihydroxy-4-methoxybenzophenone										Phenylpropanol and phenols					C14H12O5	ZM-007.mol
2'-O-methylisoliquiritigenin										Phenylpropanol and phenols					C16H14O4	ZM-008.mol
2'-O-methylphlorethin										Alkaloid					C16H18O4	ZM-009.mol
3-pyridylcarbinol										Alkaloid					C6H7NO	ZM-010.mol
4,4'-dihydroxychalcone										Flavonoids					C16H14O3	ZM-011.mol
7,4'-dihydroxyhomoisoflavanone										Flavonoids					C16H14O4	ZM-012.mol
7-hydroxy-3-(4-hydroxylbenzyl)chroman										Flavonoids					C16H16O3	ZM-013.mol
(E)-5,7-dihydroxy-3-(4'-hydroxybenzylidene) chroman-4-one							(E)-5,7-dihydroxy-3-(4'-hydroxybenzylidene) chroman-4-one			Flavonoids					C16H12O5	ZM-014.mol
Afzelin							阿福豆苷			Flavonoids	482-39-3				C21H20O10	ZM-015.mol
alpha-humulene							ALPHA-律草烯			Phenylpropanol and phenols	6753-98-6				C15H24	ZM-016.mol
anemarchalconyn										Phenylpropanol and phenols					C15H10O3	ZM-017.mol
anemarcoumarin A										Lignin compounds					C16H12O4	ZM-018.mol
anemarrhena A										Phenylpropanol and phenols					C23H22O5	ZM-019.mol
anemarrhena B										Phenylpropanol and phenols					C32H34O6	ZM-020.mol
anemarrhenasapinin Ⅲ							知母皂苷Ⅲ			Saponins					C39H64O14	ZM-021.mol
anemarrhenasaponin I							知母皂苷 I			Saponins	163047-21-0				C39H66O14	ZM-022.mol
anemarrhenasaponin Ia							知母皂苷 Ia			Saponins	221317-02-8				C40H68O14	ZM-023.mol
Asparagoside G							石刁柏苷G			Saponins	60267-27-8				C51H86O24	ZM-024.mol
Asparagoside H							石刁柏苷H			Saponins	60267-28-9				C56H94O28	ZM-025.mol
asperglaucide										Saponins	56121-42-7				C27H28N2O4	ZM-026.mol
aurantiamide										Alkaloid	58115-31-4				C25H26N2O3	ZM-027.mol
aurantiamide acetate							枸杞酰胺			Alkaloid					C27H28N2O4	ZM-028.mol
2',4',4-trihydroxychalcone							2',4',4-trihydroxychalcone			Phenylpropanol and phenols					C16H14O4	ZM-029.mol
broussonin A										Lignin compounds	73731-87-0				C16H18O3	ZM-030.mol
broussonin B										Lignin compounds	73731-86-9				C16H18O3	ZM-031.mol
(2S)-7,4'-dihydroxy-5-methoxyflavanone							(2S)-7,4'-dihydroxy-5-methoxyflavanone			Phenylpropanol and phenols					C16H14O5	ZM-032.mol
Chrysanthemaxanthin							菊黄质				27780-11-6				C40H56O3	ZM-033.mol
Chrysophanic acid							大黄酚			Phenylpropanol and phenols	481-74-3				C15H10O4	ZM-034.mol
(Z)-4',4''-(3-nethenyl-1-propene-1,3-diyl) bisphenol							(Z)-4',4''-(3-nethenyl-1-propene-1,3-diyl) bisphenol			Lignin compounds					C18H20O2	ZM-035.mol
degalactotigonin										Saponins	39941-51-0				C50H82O22	ZM-036.mol
Desglucolanatigonin II							去葡萄糖替告皂苷Ⅱ			Saponins					C50H82O22	ZM-037.mol
diosgenin							薯蓣皂苷元			Saponins	512-06-1				C27H42O3	ZM-038.mol
D-Nicotine										Alkaloid	25162-00-9				C10H14N2	ZM-039.mol
1,3-di-P-hydroxyphenyl-4-penten-1-one							1,3-di-P-hydroxyphenyl-4-penten-1-one			Phenylpropanol and phenols					C17H16O3	ZM-040.mol
Emodin							大黄素			Phenylpropanol and phenols	518-82-1				C15H10O5	ZM-041.mol
(2,3-dihydroxy-4-methoxyphenyl)(4-hydroxyphenyl)-methanone							(2,3-dihydroxy-4-methoxyphenyl)(4-hydroxyphenyl)-methanone			Phenylpropanol and phenols					C14H12O6	ZM-042.mol
Foliamangiferoside A										Phenylpropanol and phenols					C20H24O11	ZM-043.mol
Ginkgoic acid							银杏酸			Phenylpropanol and phenols	22910-60-7				C22H34O3	ZM-044.mol
gitogenin							支脱皂苷元			Alkaloid	511-96-6				C27H44O4	ZM-045.mol
Hippeastrine							小星石蒜			Flavonoids	477-17-8				C17H17NO5	ZM-046.mol
Icaritin							去水淫羊藿黄素			Phenylpropanol and phenols	118525-40-9				C21H20O6	ZM-047.mol
Iriflophenone										Saponins	52591-10-3				C13H10O5	ZM-048.mol
isoarsasapogenin							异菝葜皂苷元			Saponins					C27H44O3	ZM-049.mol
isomangiferin							异芒果苷			Flavonoids	24699-16-9				C19H18O11	ZM-050.mol
Isomangiferolic acid										Flavonoids	13878-92-7				C30H48O3	ZM-051.mol
isosa-kuranetin										isosa-kuranetin	480-43-3				C16H14O5	ZM-052.mol
macrostemonoside F							薤白皂苷 F			Saponins	151215-11-1				C45H74O18	ZM-053.mol
macrostemonoside J							薤白皂苷 J			Saponins	159935-09-8				C45H76O20	ZM-054.mol
Mangiferin							芒果苷			Flavonoids	4773-96-0				C19H18O11	ZM-055.mol
Mangiferolic acid							(3BETA,24E)-3-羟基-9,19-环羊毛甾-24-烯-26-酸			Saponins	4184-34-3				C30H48O3	ZM-056.mol
Marcogenin diglycoside										Saponins					C39H64O14	ZM-057.mol
markosapogenin							马尔可皂苷元			Saponins					C27H44O4	ZM-058.mol
Monomethyl lithospermate							9-紫草酸甲酯			Phenylpropanol and phenols	933054-33-2				C28H24O12	ZM-059.mol
neogitogenin							新吉托皂苷元			Saponins					C27H44O4	ZM-060.mol
Neomangiferin							新芒果苷			Flavonoids	64809-67-2				C25H28O16	ZM-061.mol
nicotinamide										Alkaloid	98-92-0				C6H6N2O	ZM-062.mol
nicotinic acid							烟酸			Alkaloid	59-67-6				C6H5NO2	ZM-063.mol
Nonadienal											30551-17-8				C9H14O	ZM-064.mol
nyasol							尼艾酚			Phenylpropanol and phenols	96895-25-9				C17H16O2	ZM-065.mol
N-para-ferulyl tyramine										Alkaloid					C17H17NO3	ZM-066.mol
N-trans ferulyl tyramine										Alkaloid	66648-43-9				C18H19NO4	ZM-067.mol
N-cis-ferulyl tyramine										Alkaloid	80510-09-4				C19H25NO4	ZM-068.mol
officinalisnin-I										Saponins	57944-18-0				C45H76O19	ZM-069.mol
purpureagitoside							紫花吉托苷			Saponins	54191-26-3				C56H94O29	ZM-070.mol
sarsasapogenin							菝葜皂苷元			Saponins	126-19-2				C27H44O3	ZM-071.mol
Schidigerasaponin F2										Saponins					C39H64O14	ZM-072.mol
tigogenin							剑麻皂苷元			Saponins	77-60-1				C27H44O3	ZM-073.mol
Timopregnane A										Saponins					C34H56O12	ZM-074.mol
timosaponin A Ⅰ							知母皂苷 A Ⅰ			Saponins					C33H54O8	ZM-075.mol
timosaponin A Ⅱ							知母皂苷 A Ⅱ			Saponins					C39H64O14	ZM-076.mol
timosaponin A Ⅲ/xilingsaponin A							知母皂苷 A Ⅲ/西陵皂苷 A			Saponins	41059-79-4				C39H64O13	ZM-077.mol
timosaponin A Ⅳ							知母皂苷 A Ⅳ			Saponins					C39H64O13	ZM-078.mol
timosaponin BⅠ/anemarsaponin E							知母皂苷 BⅠ/知母皂苷 E			Saponins	136565-73-6				C46H78O19	ZM-079.mol
timosaponin BⅡ/prototimosaponin A Ⅲ							知母皂苷 BⅡ/原知母皂苷 A Ⅲ			Saponins	136656-07-0				C45H76O19	ZM-080.mol
timosaponin BⅢ/ anemarrhenasaponin Ⅳ/ timosaponin B/ pseudoprototimosaponin AⅢ							知母皂苷 BⅢ/知母皂苷Ⅳ/知母皂苷B/伪原知母皂苷 AⅢ			Saponins	142759-74-8				C45H74O18	ZM-081.mol
timosaponin BⅣ(C51)							知母皂苷 BⅣ(C51)			Saponins					C51H84O23	ZM-082.mol
timosaponin BⅣ(C57)							知母皂苷 BⅣ(C57)			Saponins					C58H98O26	ZM-083.mol
timosaponin BⅤ(C46)							知母皂苷 BⅤ(C46)			Saponins					C46H78O19	ZM-084.mol
timosaponin BⅤ(C57)							知母皂苷 BⅤ(C57)			Saponins					C58H100O29	ZM-085.mol
timosaponin BⅥ							知母皂苷 BⅥ			Saponins					C59H102O29	ZM-086.mol
timosaponin C							知母皂苷 C			Saponins	185432-00-2				C45H74O18	ZM-087.mol
timosaponin C1							知母皂苷 C1			Saponins					C56H92O28	ZM-088.mol
timosaponin C2/timosaponin H2							知母皂苷 C2/知母皂苷 H2			Saponins					C57H94O28	ZM-089.mol
timosaponin D							知母皂苷 D			Saponins					C45H74O19	ZM-090.mol
timosaponin D1/ timosaponin I1							知母皂苷 D1/知母皂苷 I1			Saponins					C56H94O29	ZM-091.mol
timosaponin D2/ timosaponin I2							知母皂苷 D2/知母皂苷 I2			Saponins					C57H96O29	ZM-092.mol
timosaponin E1							知母皂苷 E1			Saponins	222018-46-4				C45H76O19	ZM-093.mol
timosaponin E2							知母皂苷 E2			Saponins	222018-47-5				C46H78O19	ZM-094.mol
timosaponin F(C39)							知母皂苷 F(C39)			Saponins					C39H64O15	ZM-095.mol
timosaponin F(C50)							知母皂苷 F(C50)			Saponins					C50H82O23	ZM-096.mol
timosaponin G(C39)							知母皂苷 G(C39)			Saponins					C39H64O14	ZM-097.mol
timosaponin G(C50)							知母皂苷 G(C50)			Saponins					C50H80O23	ZM-098.mol
timosaponin H1							知母皂苷 H1			Saponins	288142-06-3				C56H92O28	ZM-099.mol
Timosaponin J							知母皂苷 J			Saponins					C46H78O20	ZM-100.mol
Timosaponin K							知母皂苷 K			Saponins					C46H78O21	ZM-101.mol
Timosaponin L							知母皂苷 L			Saponins					C45H74O19	ZM-102.mol
timosaponin N							知母皂苷 N			Saponins					C46H78O19	ZM-103.mol
timosaponin O							知母皂苷 O			Saponins					C47H80O19	ZM-104.mol
Tingenone										Saponins	50802-21-6				C28H36O3	ZM-105.mol
Trigoneoside IIa										Saponins					C44H74O18	ZM-106.mol
Uttroside B										Saponins					C56H94O28	ZM-107.mol
xilingsaponin B							西陵皂苷 B			Saponins					C45H74O18	ZM-108.mol
Zimoside A										Phenylpropanol and phenols					C21H26O10	ZM-109.mol
baohuoside							宝藿甙			Flavonoids	113558-15-9				C26H28O10	ZM-110.mol
Monomethyl-cis-Hinoki resin										Phenylpropanol and phenols					C18H18O2	ZM-111.mol
Cyclo(Tyr-Leu)										Alkaloid	82863-65-8				C15H20N2O3	ZM-112.mol
Cis-Hinoki Resin											17676-24-3				C17H16O2	ZM-113.mol
1,4,5,6,-Tetrahydroxyxanthone							1,4,5,6,-四羟基氧杂蒽酮			Flavonoids					C13H8O6	ZM-114.mol
Oxidized-cis-Hinoki resin															C17H16O3	ZM-115.mol
Icarisid							淫羊藿次甙			Flavonoids	56725-99-6				C27H30O11	ZM-116.mol
anemarrhenasaponin Ⅱ															C39H66O14	ZM-117.mol
Karatavioside Ａ											70880-60-3				C50H80O23	ZM-118.mol
Anemarsaponin C
Aspidistrin

## Sheet: BS
Item Name	Item Type	IUPAC name	Description		ccs	rccs	Synonym "Chinese Name"	Synonym "Drug Bank"	Synonym "ChemSpider"	Category	Synonym "CAS number"	Item Tag "Waters Screening Library/Pesticide"	Item Tag "Waters Screening Library/Veterinary Drug"	Item Tag "Waters Screening Library/Mycotoxin"	Formula	Structure	Adduct	Retention Time	F1	F2	F3	F4	F5	DriftTime	Comment
palbinone							芍药二酮			单萜	139954-00-0				C22H30O4	BS-001.mol
paeoniflorin							芍药苷			单萜苷	23180-57-6				C23H28O11	BS-002.mol
oxypaeoniflorin							氧化芍药苷			单萜苷	39011-91-1				C23H28O12	BS-003.mol
benzoylpaeoniflorin							苯甲酰芍药苷			单萜苷	38642-49-8				C30H32O12	BS-004.mol
albiflorin							白芍苷			单萜苷	39011-90-0				C23H28O11	BS-005.mol
paeoniflorigenone							芍药吉酮			单萜	80454-42-8				C17H18O6	BS-006.mol
paeonilactoneB							芍药内苷B			单萜	98751-78-1				C10H12O4	BS-007.mol
paeonilactoneC							芍药内苷C			单萜	98751-77-0				C17H18O6	BS-008.mol
lactiflorin							芍药新苷			单萜苷	88623-95-4				C23H26O10	BS-009.mol
benzoic acid							苯甲酸			有机酸类	65-85-0				C7H6O2	BS-010.mol
gallic acid							没食子酸			鞣质	149-91-7				C7H6O5	BS-011.mol
Betulinic acid							白桦脂酸			三萜类	472-15-1				C30H48O3	BS-012.mol
Oleanolic acid							齐墩果酸			三萜类	508-02-1				C30H48O3	BS-013.mol
hederagenin							常春藤皂苷元			三萜类	83944-28-9				C30H48O4	BS-014.mol
kaempferol-3,7-di-O-β-D-glucoside							山柰酚-3,7-二-O-β-D葡萄糖苷			黄酮类	25615-14-9				C27H30O16	BS-015.mol
1,2,3,6-tetra-O-galloyl-β-D-glucose							1,2,3,6-O-四没食子酰基葡萄糖			鞣质类	79886-50-3				C34H28O22	BS-016.mol
1,2,3,4,6-Penta-O-galloyl-β-D-glucose							1,2,3,4,6-O-五没食子酰基葡萄糖			鞣质类	14937-32-7				C41H32O26	BS-017.mol
β-Sitosterol							β-谷甾醇			甾醇类	83-46-5				C29H50O	BS-018.mol
Kaempferol 3-O-β-D-glucuronide							山柰酚-3-O-β-D-葡萄糖醛酸苷			黄酮类	22688-78-4				C21H18O12	BS-019.mol
Sucrose							蔗糖			双糖	57-50-1				C12H22O11	BS-020.mol
Citric acid							柠檬酸			有机酸类	77-92-9				C6H8O7	BS-021.mol
Adenosine							腺苷			嘌呤核苷	58-61-7				C10H13N5O4	BS-022.mol
Kaempferol							山柰酚			黄酮类	520-18-3				C15H10O6	BS-023.mol
Palmitic acid ethyl ester							棕榈酸乙酯			天然脂肪酸乙酯类	628-97-7				C18H36O2	BS-024.mol
6-hydroxycoumarin							6-羟基香豆素			香豆素类	6093-68-1				C9H6O3	BS-025.mol
C10715							丹皮酚原苷			酚类	72520-92-4				C20H28O12	BS-026.mol
Astragalin							紫云英苷			苷类	480-10-4				C21H20O11	BS-027.mol
Betulin							白桦脂醇			三萜类	473-98-3				C30H50O2	BS-028.mol
Naringenin							柚皮素			二氢黄酮类	480-41-1				C15H12O5	BS-029.mol
4-Hydroxybenzoic acid							对羟基苯甲酸			有机酸类	99-96-7				C7H6O3	BS-030.mol
Quercetin							槲皮素			黄酮类	117-39-5				C15H10O7	BS-031.mol
Ellagic acid							鞣花酸			鞣质类	476-66-4				C14H6O8	BS-032.mol
Mudanpioside H							牡丹皮苷 H			苷类	231280-71-0				C30H32O14	BS-033.mol
Paeonol							丹皮酚			酚类	552-41-0				C9H10O3	BS-034.mol
Pyrogallol							邻苯三酚			苯酚类	87-66-1				C6H6O3	BS-035.mol
galloylpaeoniflorin							没食子酰芍药苷			鞣质类	122965-41-7				C30H32O15	BS-036.mol
benzoyloxypaeoniflorin							苯甲酰氧化芍药苷			单萜苷	72896-40-3				C30H32O13	BS-037.mol
paeonilactoneA							芍药内苷A			单萜	98751-79-2				C10H14O4	BS-038.mol
methyl gallate							没食子酸甲酯			鞣质	99-24-1				C8H8O5	BS-039.mol
ethyl gallate							没食子酸酯			鞣质	831-61-8				C9H10O5	BS-040.mol
(+)-catechin							(+)儿茶素			黄酮类	154-23-4				C15H14O6	BS-041.mol
paeonisuffrone										单萜	1112995-18-2				C10H14O4	BS-042.mol
4-O-galloylalbiflorin							4-O-没食子酰白芍苷			鞣质	1201580-97-3				C30H32O15	BS-043.mol
Debenzoylpaeoniflorin							去苯甲酰芍药苷			单萜苷	23532-11-8				C16H24O10	BS-044.mol
paeonidanin										单萜苷	209969-75-5				C24H30O11	BS-045.mol
Kaempferitrin							山柰苷			黄酮类	482-38-2				C27H30O14	BS-046.mol
Glucogallin										单萜苷	58511-73-2				C13H16O10	BS-047.mol
Pedunculagin										鞣质类	7045-42-3				C34H24O22	BS-048.mol
Gallotannin										单萜苷	18483-17-5				C27H24O18	BS-049.mol
1'-O-benzoylsucrose										萜类	123499-67-2				C19H26O12	BS-050.mol
Salicylic acid							水杨酸			有机酸类	69-72-7				C7H6O3	BS-051.mol
Paeonolide							牡丹酚原甙			酚类	72520-92-4				C20H28O12	BS-052.mol
4-hydroxy-3-methoxy acetophenone							4-羟基-3-甲氧基苯乙酮			有机酸酯类	498-02-2				C9H10O3	BS-053.mol
Methyl salicylate							水杨酸甲酯			鞣质类	119-36-8				C8H8O3	BS-054.mol
Eugeniin							丁子芽鞣素			鞣质类	58970-75-5				C41H30O26	BS-055.mol
Daucosterol							西托糖苷			甾体类	474-58-8				C35H60O6	BS-056.mol
11α,12α-epoxy-3β,23-dihydroxy-30-eorolean-20(29)-en-28,13β-olide							11α,12α-环氧-3β,23-二羟基-30-去甲齐墩果-20(29)-烯-28,13β-内酯			三萜类	186140-36-3				C29H42O5	BS-057.mol
3β-hydroxyolean-12-en-28-al							齐墩果醛			三萜类	17020-22-3				C30H48O2	BS-058.mol
(-)-Gallocatechin gallate							没食子酰儿茶素没食子酸酯			鞣质类	4233-96-9				C22H18O11	BS-059.mol
Paeonoside	Paeonoside						丹皮酚苷			酚类	20309-70-0				C15H20O8	BS-060.mol
Galloyloxypaeoniflorin							没食子酰氧化芍药苷			鞣质类	145898-93-7				C30H32O16	BS-061.mol
Paeoniflorin sulfite							芍药苷亚硫酸酯			单萜苷	1146967-98-7				C23H28O13S	BS-062.mol
apiopaeonoside							丹皮酚新苷			单萜苷	100291-86-9				C20H28O12	BS-063.mol
AlbiflorinR1							白芍苷R1			单萜苷					C23H28O11	BS-064.mol
30-norhederagenin										三萜类					C29H44O4	BS-065.mol
galloyl-albiflorin							没食子酰白芍苷			鞣质类					C30H32O15	BS-066.mol
(Z)-(1S,5R)-β-pinen-10-yl-β-vicianoside							β-10-蒎烯基-β-巢菜苷			单萜苷					C21H34O10	BS-067.mol
3β-hydroxy-11α,12α-epoxy-olean-28-13β-olide										三萜类					C30H46O5	BS-068.mol
11α,12α-epoxy-3β,23-dihydroxyolean-28,13β-olide										三萜类					C30H46O6	BS-069.mol
3β-hydroxy-11-OXO-olean-12-en-28-oic acid										三萜类					C30H46O4	BS-070.mol
23-hydroxy-betulinic acid										三萜类					C30H48O4	BS-071.mol
xoybenzoylpaeoniflorin							氧化苯甲酰芍药苷			单萜苷类					C30H34O12	BS-072.mol
6-O-β-D-glucopyranosyl-lactinolide										单萜苷类					C16H26O9	BS-073.mol
1-O-β-D-glucopyranosyl-paeonisuffrone										单萜苷类					C16H24O9	BS-074.mol
paeonilactinone										单萜类					C10H16O2	BS-075.mol
2-Furylmethy l ketone							2-乙酰基呋喃			挥发油类	1192-62-7				C6H6O2	BS-076.mol
benzaldehyde							苯甲醛			挥发油类	100-52-7				C7H6O	BS-077.mol
3-Hydroxypyridine							3-羟基吡啶			挥发油类	109-00-2				C5H5NO	BS-078.mol
Butyl alcohol							叔丁醇			挥发油类	75-65-0				C4H10O	BS-079.mol
Methyl benzoate							苯甲酸甲酯			挥发油类	93-58-3				C8H8O2	BS-080.mol
Phenylacetaldehyde							苯乙醛			挥发油类	122-78-1				C8H8O	BS-081.mol
Acetophenone							苯乙酮			挥发油类	98-86-2				C8H8O	BS-082.mol
4,7-dimethylbenzofuran										挥发油类	28715-26-6				C10H10O	BS-083.mol
Furfural alcohol							糠醇			挥发油类	98-00-0				C5H6O2	BS-084.mol
Perilla alcohol							紫苏醇			挥发油类	536-59-4				C10H16O	BS-085.mol
Benzyl alcohol							苯甲醇			挥发油类	100-51-6				C7H8O	BS-086.mol
2,6-di-tert-butyl-4-methylphenol							2,6-二叔丁基-4-甲基苯酚			挥发油类	128-37-0				C15H24O	BS-087.mol
Phenol							苯酚			挥发油类	108-95-2				C6H6O	BS-088.mol
p-Cresol							对甲酚			挥发油类	106-44-5				C7H8O	BS-089.mol
m-Cresol							间甲酚			挥发油类	108-39-4				C7H8O	BS-090.mol
m-tert-Butylphenol							3-叔丁基苯酚			挥发油类	585-34-2				C10H14O	BS-091.mol
Carvacrol							香芹酚			挥发油类	499-75-2				C10H14O	BS-092.mol
Thymol							百里酚			挥发油类	89-83-8				C10H14O	BS-093.mol
isopaeoniflorin							异芍药苷			单萜苷类					C23H28O11	BS-094.mol
4'-O-benzoylpaeoniflorin							4'-O-苯甲酰芍药苷			单萜苷类					C30H32O12	BS-095.mol
acetylpaeoniflorin							乙酰芍药苷			单萜苷类					C25H30O12	BS-096.mol
4-O-methyl-benzoylpaeoniflorin							4-O-甲基-苯甲酰芍药苷			单萜苷类					C31H34O12	BS-097.mol
1-O-β-D-glucopyranosyl-8-O-benzoylpaeonisuffrone										苷类					C23H28O10	BS-098.mol
6'-O-benzoylpaeonidanin										苷类					C31H34O12	BS-099.mol
naringenin-7-O-β-D-glucopyranoside							柚皮素-7-O-β-D-葡萄糖苷			苷类					C21H22O10	BS-100.mol
DL-Arabinose							阿拉伯糖			糖类	147-81-9				C5H10O5	BS-101.mol
D-Mannitol							甘露糖			糖类	69-65-8				C6H14O6	BS-102.mol
Inositol							肌醇			环己烷类	87-89-8				C6H12O6	BS-103.mol
Stigmasterol							豆甾醇			甾醇类	83-48-7				C29H48O	BS-104.mol
2,3-dihydroxy-4-methoxyacetophenone							2,3-二 羟 基-4-甲 氧基苯乙酮			挥发类	708-53-2				C9H10O4	BS-105.mol
2-Hydroxybenzyl alcoho							邻羟基苄醇			挥发类	90-01-7				C7H8O2	BS-106.mol
α-spinastero							α-菠菜甾醇			甾醇类	481-18-5				C29H48O	BS-107.mol
Glucose							葡萄糖			糖类	50-99-7				C6H12O6	BS-108.mol
Vanillic acid							香草酸			有机酸类	121-34-6				C8H8O4	BS-109.mol
Syringic acid							丁香酸			有机酸类	530-57-4				C9H10O5	BS-110.mol
benzoylalbiflorin							苯甲酰芍药内酯苷			单萜苷酯类	184103-78-4				C30H32O12	BS-111.mol
benzoylpaeoniflorin sulfonate							苯甲酰芍药苷亚硫酸酯			单萜苷酯类					C30H32O14S	BS-112.mol
Desbenzoylpaeoniflorin sulfonate							去苯甲酰芍药苷亚硫酸酯			单萜苷酯类					C16H24O12S	BS-113.mol
Galloylpaeoniflorin sulfonate							没食子酰芍药苷亚硫酸酯			单萜苷酯类					C30H32O17S	BS-114.mol
oxypaeoniflorin sulfonate							氧化芍药苷亚硫酸酯			单萜苷酯类					C30H32O18S	BS-115.mol
8- O-galloyl desbenzoylpaeoniflorin										单萜苷酯类					C23H28O14	BS-116.mol
8-O-isovaleryl desbenzoylpaeoniflorin										单萜苷酯类					C24H30O13	BS-117.mol
6'-O-galloyl desbenzoylpaeoniflorin										单萜苷酯类					C31H34O17	BS-118.mol
6'-O-vanillylpaeoniflorin										单萜苷酯类					C31H34O14	BS-119.mol
3',6'-di-O-galloylpaeoniflorin										单萜苷酯类					C38H38O21	BS-120.mol
isomaltopaeoniflorin										单萜苷酯类					C30H40O15	BS-121.mol
6'-O-galloyl desbenzoylalbiflorin										单萜苷酯类					C23H28O15	BS-122.mol
Desbenzoylpaeoniflorin							8-O-去苯甲酰基芍药甙								C16H24O10	BS-123.mol
Mudanpioside E															C24H30O13	BS-124.mol
Mudanpioside F															C16H24O8	BS-125.mol
d-catechin															C15H14O6	BS-126.mol
Caffeic acid															C9H8O4	BS-127.mol
Dictamnoside A															C21H36O9	BS-128.mol
Scopoletin															C10H8O4	BS-129.mol
Ferulic acid															C10H10O4	BS-130.mol
Atractylenolide III															C15H20O3	BS-131.mol
Atractylenolide I															C15H18O2	BS-132.mol
Atractylenolide II															C15H20O2	BS-133.mol
Atractylodin															C13H10O	BS-134.mol
Dibutyl phthalate															C16H22O4	BS-135.mol
Atractylon															C15H20O	BS-136.mol
Biatractylolide															C30H38O4	BS-137.mol
Linoleic acid															C18H32O2	BS-138.mol
Palmitic acid															C16H32O2	BS-139.mol
Mudanpioside A															C31H34O13	BS-140.mol

## Sheet: DH
ItemName	ItemType	IUPACname	Description		ccs	rccs	Synonym"ChineseName"	Synonym"DrugBank"	Synonym"ChemSpider"	Category	Synonym"CASnumber"	ItemTag"WatersScreeningLibrary/Pesticide"	ItemTag"WatersScreeningLibrary/VeterinaryDrug"	ItemTag"WatersScreeningLibrary/Mycotoxin"	Formula	Structure	Adduct	RetentionTime	F1	F2	F3	F4	F5	DriftTime	Comment
Columbianadin	Compound						二氢欧山芹素			香豆素类	5058-13-9		VeterinaryDrug		C19H20O5	DH-001.mol
Columbianetin							二氢欧山芹醇			香豆素类	3804-70-4				C14H14O4	DH-002.mol
ColumbianetinAcetate							二氢欧山芹醇乙酸酯			香豆素类	23180-65-6				C16H16O5	DH-003.mol
β-D-glucosyl-Columbia							二氢山芹醇-β-D-葡萄糖苷			香豆素类					C20H24O9	DH-004.mol
Columbianin							哥伦比亚苷			香豆素类					C26H34O14	DH-005.mol
ColumbianetinPropionate							二氢欧山芹醇丙酸酯			香豆素类					C17H18O5	DH-006.mol
Dihydrocolumbianadin							脱水二氢欧山芹素			香豆素类					C19H22O5	DH-007.mol
Angelidiol							当归二醇			香豆素类					C14H14O5	DH-008.mol
Angelmarin							当归素			香豆素类	876384-53-1				C23H20O6	DH-009.mol
Bergapten							香柑内酯			香豆素类	484-20-8				C12H8O4	DH-010.mol
Bergaptol							佛手酚			香豆素类	486-60-2				C11H6O4	DH-011.mol
Psoralen							补骨脂素			香豆素类	149104-88-1				C11H6O3	DH-012.mol
Xanthotoxin							花椒毒素			香豆素类	80386-99-8				C12H8O4	DH-013.mol
Pabulenol							栓翅芹烯醇			香豆素类	33783-80-1				C16H14O5	DH-014.mol
Imperatorin							欧前胡素			香豆素类	5401-94-5				C16H14O4	DH-015.mol
Oxypeucedanine							氧化前胡素			香豆素类					C16H14O5	DH-016.mol
OxypeucedaninHydrate							水合氧化前胡内酯			香豆素类	2643-85-8				C16H16O6	DH-017.mol
Isoimperatorin							异欧前胡素			香豆素类	482-45-1				C16H14O4	DH-018.mol
tert.-O-β-D-glucopy-ranosyl-(R)-Byakangelicin										香豆素类					C23H28O12	DH-019.mol
sec.-O-β-D-glucopy-ranosyl-(R)-Byakangelicin										香豆素类					C23H28O12	DH-020.mol
Isooxypeucedanine										香豆素类					C16H14O5	DH-021.mol
Cnidilin							异珊瑚菜素			香豆素类	14348-22-2				C17H16O5	DH-022.mol
sec-o-Acetylbyakangelicin							乙酰当归素			香豆素类					C19H20O8	DH-023.mol
Byak-angelicin							白当归素			香豆素类	19573-01-4				C17H18O7	DH-024.mol
Ferulin										香豆素类	29455-13-8				C17H16O6	DH-025.mol
Neobyakangelicol							新比克白芷内酯			香豆素类	35214-82-5				C17H16O6	DH-026.mol
Isopimpinellin							异茴芹内酯			香豆素类	482-27-9				C13H10O5	DH-027.mol
Osthole							甲氧基欧芹素			香豆素类	484-12-8				C15H16O3	DH-028.mol
Angelitriol							当归三醇			香豆素类					C15H18O6	DH-029.mol
Scopoletin							东莨菪内酯			香豆素类	92-61-5				C10H8O4	DH-030.mol
2'-deoxymeRanzinHydrate							2'一去氧橙皮内酯水合物			香豆素类					C15H18O4	DH-031.mol
6-O-β-D-apiofuranosyl-(1→6)-β-D-glucopyranosyl-Scopoletin							6-O-β-D-呋喃芹糖基-(1→6)-β-D-吡喃葡萄糖基-东莨菪内酯			香豆素类					C20H24O13	DH-032.mol
7-O-β-D-glucopyranosyl-Umbelliferone							7-O-β-D-吡喃葡萄糖基-伞形花内酯			香豆素类					C15H16O8	DH-033.mol
7-O-β-D-apiofuranosyl-(1→6)-β-D-glucopyranosyl-Umbelliferone							7-O-β-D-呋喃芹糖基-(1→6)-β-D-吡喃葡萄糖基-伞形花内酯			香豆素类					C20H24O12	DH-034.mol
Anpubesol							毛当归醇			香豆素类					C20H26O7	DH-035.mol
Isoangelol							异当归醇			香豆素类					C20H24O7	DH-036.mol
6-[(1R,2R)-1,2-dihydroxy-3-β-D-glucosyloxy-3-methylbutyl]-7-methoxycoumarin							6-[(1R,2R)-1,2-二羟基-3-β-D-吡喃葡萄糖氧基-3-甲基丁基]-7-甲氧基香豆素			香豆素类					C20H24O13	DH-037.mol
Angepubebisin							重齿毛当归素			香豆素类					C21H28O11	DH-038.mol
Peucedanol							前胡醇			香豆素类	46992-81-8				C14H16O5	DH-039.mol
Ulopterol							白花前胡醇			香豆素类	28095-18-3				C15H18O5	DH-040.mol
Osthenol							欧芹酚			香豆素类	484-14-0				C14H14O3	DH-041.mol
Glabra-lactone							当归素			香豆素类					C16H16O5	DH-042.mol
Angelin										香豆素类					C20H22O5	DH-043.mol
8-(3-hydroxy-isovaleryl)-5,7-Dimethoxycoumarin							8-(3-羟基-异戊酰)-5,7-二甲氧基香豆素			香豆素类					C16H18O6	DH-044.mol
Coumurrayin							月橘香豆素			香豆素类					C16H18O4	DH-045.mol
7-methoxy-8-Senecioylcoumarin							7-甲氧基-8-千里光酰香豆素			香豆素类					C15H14O4	DH-046.mol
Umbelliprenin							伞形花醚			香豆素类	30413-87-7				C24H30O3	DH-047.mol
AngelolADehydration							脱水当归醇A			香豆素类					C20H22O6	DH-048.mol
IsoangelolDehydration							脱水异当归醇A			香豆素类					C20H22O6	DH-049.mol
AnpubesolDehydration							脱水毛当归醇			香豆素类					C20H24O6	DH-050.mol
AngelolCDehydration							脱水当归醇C			香豆素类					C20H24O6	DH-051.mol
Apiosylskimmin							阿彼斯基姆素			香豆素类	466-26-2				C20H24O12	DH-052.mol
MeranzinHydrate							橙皮内酯水合物			香豆素类	5673-37-0				C15H18O5	DH-053.mol
Umbelliferone							伞形花内酯			香豆素类	93-35-6				C9H6O3	DH-054.mol
Marmesinin							异紫花前胡苷			香豆素类	27497-13-8				C20H22O6	DH-055.mol
Nodakenetin							紫花前胡苷元			香豆素类	495-32-9				C14H14O4	DH-056.mol
Isobergapten							异佛手柑内酯			香豆素类	482-48-4				C12H8O4	DH-057.mol
Isopsoralen							异补骨脂素			香豆素类	523-50-2				C11H6O3	DH-058.mol
AngelolA							当归醇A			香豆素类					C20H24O7	DH-059.mol
AngelolJ							当归醇J			香豆素类					C17H22O6	DH-060.mol
AngelolG							当归醇G			香豆素类	83199-38-6				C20H24O7	DH-061.mol
AngelolB							当归醇B			香豆素类					C20H24O7	DH-062.mol
AngelolC							当归醇C			香豆素类					C20H26O7	DH-063.mol
AngelolI							当归醇I			香豆素类					C20H26O7	DH-064.mol
AngelolD							当归醇D			香豆素类					C20H24O7	DH-065.mol
AngelolK							当归醇K			香豆素类					C20H24O7	DH-066.mol
AngelolL							当归醇L			香豆素类					C20H26O7	DH-067.mol
Nodaketin							紫花前胡素			香豆素类					C19H20O5	DH-068.mol
Angenomalin							川白芷素			香豆素类	18199-64-9				C14H12O3	DH-069.mol
Daucosteroside							胡萝卜苷			甾体类					C35H60O6	DH-070.mol
Stigmasterol							豆甾醇			甾体类	83-48-7				C29H48O	DH-071.mol
β-Sitosterol							β-谷固醇			甾体类	83-46-5				C29H50O	DH-072.mol
LinoleicAcid							亚油酸			其他	60-33-3				C18H32O2	DH-073.mol
StearicAcid							硬脂酸			其他	30399-84-9				C18H36O2	DH-074.mol
FerulicAcid							阿魏酸			其他	1135-24-6				C10H10O4	DH-075.mol
3-O-trans-FeruloylquinicAcid							3-O-反式阿魏酰基奎宁酸			其他					C17H20O9	DH-076.mol
3-O-trans-CoumaroylquinicAcid							3-O-反式香豆酰基奎宁酸			其他					C16H18O8	DH-077.mol
2-Hydroxy-4-Methylacetophenon							2-羟基-4-甲基苯乙酮			其他					C9H10O2	DH-078.mol
IsoferulicAcid							异阿魏酸			其他	537-73-5				C10H10O4	DH-079.mol
CaffeicAcid							咖啡酸			其他	331-39-5				C9H8O4	DH-080.mol
Bisabolangelone							没药当归烯酮			其他	30557-81-4				C15H20O3	DH-081.mol
Adenosine							腺苷			生物碱类	58-61-7				C10H13N5O4	DH-082.mol
Uridine							尿嘧啶核苷			生物碱类	58-96-8				C9H12N2O6	DH-083.mol
Sucrose							蔗糖			糖类	57-50-1				C12H22O11	DH-084.mol
Falcarindiol							镰叶芳醇			其他	55297-87-5				C17H24O2	DH-085.mol
11(S),16(R)-Dihydroxy-Octadeca-9Z,17-dien-12,14-diyn-1-yl Acetate										其他					C20H28O4	DH-086.mol
Angepubefurin							独活呋灵			苯丙素类					C19H30O4	DH-087.mol
NeochlorogenicAcid							新绿原酸			苯丙素类	202650-88-2				C16H18O9	DH-088.mol
ChlorogenicAcid							绿原酸			其他	202650-88-2				C16H18O9	DH-089.mol
4-DicaffeoylquinicAcid							4-二咖啡基奎宁酸			其他					C16H18O9	DH-090.mol
IsochlorogenicAcidB							异绿原酸B			其他	1890131-07-3				C25H24O12	DH-091.mol
IsochlorogenicAcidA							异绿原酸A			其他	1890190-55-2				C25H24O12	DH-092.mol
IsochlorogenicAcidC							异绿原酸C			其他	1890131-01-7				C25H24O12	DH-093.mol
2,3,4,4,4,4,9-tetrahydro-1H-pyridino(3,4,2)indole-3-carboxylicacid							2,3,4,9-四氢-1H-吡啶并(3,4-b)吲哚-3-羧酸			生物碱类					C12H12N2O2	DH-094.mol
1-methyl-1,4-cyclohexadiene							1-甲基-1,4-环己二烯			挥发油类	4313-57-9				C7H10	DH-095.mol
2-methyloctane							2-甲基辛烷			挥发油类	3221-61-2				C9H20	DH-096.mol
nonane							壬烷			挥发油类	111-84-2				C9H20	DH-097.mol
3-carene							3-蒈烯			挥发油类	13466-78-9				C10H16	DH-098.mol
camphene							莰烯			挥发油类	79-92-5				C10H16	DH-099.mol
4-methylene-1-(1-methylethyl)-bicyclo[3.1.0]hex-2-ene							4-亚甲基-1-异丙基-双环[3.1.0]己-2-烯			挥发油类	36262-09-6				C10H14	DH-100.mol
3-methylnonane							3-甲基壬烷			挥发油类	5911-04-6				C10H22	DH-101.mol
3-methylene-1,5,5-trimethylcyclohexene							3-亚甲基-1,5,5-三甲基环己烯			挥发油类	16609-28-2				C10H16	DH-102.mol
4-methylene-1-(1-methylethyl)-bicyclo[3.1.0]hexane							香桧烯			挥发油类	3387-41-5				C10H16	DH-103.mol
(1S)-6,6-dimethyl-2-methylene-bicyclo[3.1.1]heptane							l-β-蒎烯			挥发油类	18172-67-3				C10H16	DH-104.mol
β-Myrcene							β-月桂烯			挥发油类	123-35-3				C10H16	DH-105.mol
decane							癸烷			挥发油类	124-18-5				C10H22	DH-106.mol
α-phellandrene							α-水芹烯			挥发油类	99-83-2				C10H16	DH-107.mol
1,3,3-trimethyl-tricyclo[2.2.1.02,6]heptane							1,3,3-三甲基三环[2.2.1.02,6]庚烷			挥发油类	488-97-1				C10H16	DH-108.mol
m-cymene							间-聚伞花素			挥发油类	535-77-3				C10H14	DH-109.mol
β-phellandrene							β-水芹烯			挥发油类	555-10-2				C10H16	DH-110.mol
2-nonanone							2-壬酮			挥发油类	821-55-6				C9H18O	DH-111.mol
2-nonanol							2-壬醇			挥发油类	628-99-9				C9H20O	DH-112.mol
1-octanol							正辛醇			挥发油类	68603-15-6				C8H18O	DH-113.mol
6-camphenone							6-莰烯酮			挥发油类	38476-47-0				C10H14O	DH-114.mol
2-methyl-1-methylene-3-(1-methylethenyl)-cyclopentane							2-甲基-1-亚甲基-3-(1-甲基乙烯基)-环戊烷			挥发油类					C10H16	DH-115.mol
trans-1-methyl-4-(1-methylethyl)-2-cyclohexen-1-ol							反式-1-甲基-4-异丙基-2-环己烯-1-醇			挥发油类	29803-81-4				C10H18O	DH-116.mol
2,2,3-trimethyl-3-cyclopentene-1-acetaldehyde							2,2,3-三甲基-3-环戊烯-1-乙醛			挥发油类	4501-58-0				C10H16O	DH-117.mol
cis-1-methyl-4-(1-methylethyl)-2-cyclohexen-1-ol							顺式-1-甲基-4-异丙基-2-环己烯-1-醇			挥发油类	29803-82-5				C10H18O	DH-118.mol
4,6,6-trimethyl-bicyclo[3.1.1]hept-3-en-2-ol							4,6,6-三甲基双环[3.1.1]庚-3-烯-2-醇			挥发油类	473-67-6				C10H16O	DH-119.mol
pentylbenzene							戊基苯			挥发油类	538-68-1				C11H16	DH-120.mol
4-methyl-1-(1-methylethyl)-3-cyclohexen-1-ol							松油醇-4			挥发油类	28219-82-1				C10H18O	DH-121.mol
undecatriene(E,E)-1,3,5-undecatriene							(E,E)-1,3,5-十一烷三烯			挥发油类	16356-11-9				C11H18	DH-122.mol
4-(1-methylethyl)-2-cyclohexen-1-one							4-(异丙基)-2-环己烯-1-酮			挥发油类	2158-61-4				C9H14O	DH-123.mol
decanal							正癸醛			挥发油类	112-31-2				C10H20O	DH-124.mol
(E)-6-nonen-1-ol							(E)-6-壬烯-1-醇			挥发油类	31502-19-9				C9H18O	DH-125.mol
10-methyl-1-undecen							10-甲基-1-十一碳烯			挥发油类	22370-55-4				C12H24	DH-126.mol
3,5-dimethoxytoluene							3,5-二甲氧基甲苯			挥发油类	4179-19-5				C9H12O2	DH-127.mol
4-(1-methylethyl)-1-cyclohexene-1-carboxaldehyde							4-异丙基-1-环己烯-1-甲醛			挥发油类	21391-98-0				C10H16O	DH-128.mol
4-hydroxy-3-methylacetophenone							4-羟基-3-甲基苯乙酮			挥发油类	876-02-8				C9H10O2	DH-129.mol
tridecane							十三烷			挥发油类	629-50-5				C13H28	DH-130.mol
2-methyl-5-(1-methylethyl)-phenol							香荆芥酚			挥发油类	499-75-2				C10H14O	DH-131.mol
8-methyl-1-decene							8-甲基-1-癸烯			挥发油类	61142-79-8				C11H22	DH-132.mol
n-decylacetate							乙酸癸酯			挥发油类	112-17-4				C12H24O2	DH-133.mol
β-gurjunene							β-古芸烯			挥发油类	73464-47-8				C15H24	DH-134.mol
[s-(R＊,s＊)]-3-(1,5-dimethyl-4-hexenyl)-6-methylene-cyclohexene							[s-(R＊,s＊)]-3-(1,5-二甲基-4-己烯基)-6-亚甲基-环己烯			挥发油类	20307-83-9				C15H24	DH-135.mol
α-caryophyllene							α-石竹烯			挥发油类	6753-98-6				C15H24	DH-136.mol
β-sesquiphellandrene							β-倍半水芹烯			挥发油类	20307-83-9				C15H24	DH-137.mol
(E)-7,11-dimethyl-3-methylene-1,6,10-dodecatriene							(E)-7,11-二甲基-3-亚甲基-1,6,10-十二烷三烯			挥发油类	18794-84-8				C15H24	DH-138.mol
α-selinene							α-芹子烯			挥发油类	473-13-2				C15H24	DH-139.mol
ledol							喇叭醇			挥发油类	577-27-5				C15H26O	DH-140.mol
(E)-3,7,11-trimethyl-1,6,10-dodecatrien-3-ol							(E)-3,7,11-三甲基-1,6,10-十二烷三烯-3-醇			挥发油类	40716-66-3				C15H26O	DH-141.mol
(-)-globulol							(-)-蓝桉醇			挥发油类	489-41-8				C15H26O	DH-142.mol
3,7,11-trimethyl-1,6,10-dodecatrien-3-ol							橙花叔醇			挥发油类	7212-44-4				C15H26O	DH-143.mol
[1R-(1R＊,3E,7E,11R＊)]-1,5,5,8-tetramethyl-12-oxabicyclo[9.1.0]dodeca-3,7-diene							[1R-(1R＊,3E,7E,11R＊)]-1,5,5,8-四甲基-12-环氧双环[9.1.0]十二烷-3,7-二烯			挥发油类	19888-34-7				C15H24O	DH-144.mol
cedrol							雪松醇			挥发油类	77-53-2				C15H26O	DH-145.mol
cubenol							库比烯醇			挥发油类	21284-22-0				C15H26O	DH-146.mol
cadinol							荜澄茄醇			挥发油类					C15H26O	DH-147.mol
14-methyl-oxacyclotetradecan-2-one							14-甲基环氧十四烷-2-酮			挥发油类					C14H26O2	DH-148.mol
1-tetradecene							正十四碳烯			挥发油类	1120-36-1				C14H28	DH-149.mol
α-bisabolol							α-甜没药萜醇			挥发油类	515-69-5				C15H26O	DH-150.mol
dehydroaromadendrene							去氢香橙烯			挥发油类					C15H22	DH-151.mol
Z-9-tetradecenoicacid							Z-9-十四碳烯酸			挥发油类	544-64-9				C14H26O2	DH-152.mol
ethyllaurate							十二烷酸乙酯			挥发油类	106-33-2				C14H28O	DH-153.mol
Z-11-hexadecenoicacid							Z-11-十六烯酸			挥发油类	16725-53-4				C16H30O2	DH-154.mol
oxacycloheptadec-8-en-2-one							环氧十六-8-烯-2-酮			挥发油类	123-69-3				C16H28O2	DH-155.mol
1-hexadecanol							正十六醇			挥发油类	36653-82-4				C16H34O	DH-156.mol
methylhexadecanoate							十六酸甲酯			挥发油类	112-39-0				C17H34O2	DH-157.mol

## Sheet: HH
Item Name	Item Type	IUPAC name	Description		ccs	rccs	Synonym "Chinese Name"		Synonym "ChemSpider"	Category	Synonym "CAS number"	Item Tag "Waters Screening Library/Pesticide"	Item Tag "Waters Screening Library/Veterinary Drug"	Item Tag "Waters Screening Library/Mycotoxin"	Formula	Structure	Adduct	Retention Time	F1	F2	F3	F4	F5	DriftTime	Comment
Flavone	Compound						黄酮			黄酮类	525-82-6		Veterinary Drug		C15H10O2	HH-001.mol
Flavanone							黄烷酮			黄酮类	487-26-3				C15H12O2	HH-002.mol
Flavonol							黄酮醇			黄酮类	577-85-5				C15H10O3	HH-003.mol
Flavanonol							黄烷醇			黄酮类	1621-55-2				C15H12O3	HH-004.mol
Isoflavone							异黄酮			黄酮类	574-12-9				C15H10O2	HH-005.mol
Isoflavanone							异黄酮			黄酮类	4737-27-3				C15H12O2	HH-006.mol
(E)-Chalcone							查尔酮			醌式查耳酮类	614-47-1				C15H12O	HH-007.mol
Dihydrochalcone							二氢查尔酮			醌式查耳酮类	1083-30-3				C15H14O	HH-008.mol
Hydroxysafflower yellow A							羟基红花黄色素A			黄酮苷类	78281-02-4				C27H32O16	HH-009.mol
Chlorogenic acid							绿原酸			酚酸类	327-97-9				C16H18O9	HH-010.mol
6-hydroxykaempferol-7-O-glucoside							6-羟基山奈酚-7-O-葡萄糖甙			黄酮苷类					C21H20O12	HH-011.mol
Kaempferol-3-rutinoside							山柰酚-3-芸香糖苷			黄酮苷类	17650-84-9				C27H30O15	HH-012.mol
Lirioresion A										其他类					C21H24O8	HH-013.mol
Rutin							芦丁			黄酮苷类	153-18-4				C27H30O16	HH-014.mol
Safflower yellow B							红花黄色素B			黄酮苷类					C48H54O27	HH-015.mol
Safflower yellow A							红花黄色素A			黄酮苷类	85532-77-0				C27H30O16	HH-016.mol
Luteolin 5-glucoside							木犀草素-5-O-葡萄糖苷			黄酮苷类	20344-46-1				C21H20O11	HH-017.mol
Cartormin							卡托明			黄酮苷类					C27H29NO13	HH-018.mol
Carthamone							红花醌苷			黄酮苷类	86579-00-2				C21H20O11	HH-019.mol
6-Hydroxykaempferol							6-羟基山奈酚			黄酮类	4324-55-4				C15H10O7	HH-020.mol
N,N'-[2,2'-(5,5-dihydroxy-4,4'-bi-1H-indol-3,3'-yl)diethyl]-diferulamide							N,N'-[2,2’-(5,5-二羟基-4,4’-双-1h-吲哚 -3,3’-基)二乙基]-二芳酰胺			查尔酮类					C38H32N4O6	HH-021.mol
Luteolin							木樨草素			黄酮苷类	491-70-3				C15H10O6	HH-022.mol
Carthamin							红花苷			黄酮苷类	36338-96-2				C43H42O22	HH-023.mol
Kaempferol							山柰酚			黄酮类	520-18-3				C15H10O6	HH-024.mol
9,11-Octadecadienoicacid,13-oxo-,(9Z,11E)-							9,11-十八烯酸,13-氧-,(9Z,11E)-			有机酸类	54739-30-9				C18H30O3	HH-025.mol
Kaempferol3-O-caffeoyl-sophoroside7-O-glucoside							山柰酚-3-O-槐二糖-7-O-葡萄糖苷			黄酮苷类	55136-76-0				C42H46O24	HH-026.mol
Quercetin							槲皮素			黄酮苷类	117-39-5				C15H10O7	HH-027.mol
Quercetin-3-O-β-D-glucoside							槲皮素-3-O-β-D-葡萄糖苷			黄酮苷类	482-35-9				C21H20O12	HH-028.mol
Quercetin-7-O-β-D-glucoside							槲皮素-7-O-β-D-糖苷			黄酮苷类	491-50-9				C21H22O12	HH-029.mol
Apigenin							芹菜素			黄酮类	520-36-5				C15H10O5	HH-030.mol
6-hydroxykaempferol-3-O-β-D-glucoside							6-羟基山奈酚-3-O-β-D-糖苷			黄酮苷类	31159-41-8				C21H20O12	HH-031.mol
N-[2-(5-Hydroxy-1H-indol-3-yl)ethyl]-p-coumaramide							N-[2-(5-羟基-1h-吲哚-3-基)乙基]-对香豆酰胺			查尔酮类					C19H18N2O3	HH-032.mol
1,11-tridecadiene-3,5,7,9-tetrayne							1,11-十三烷-3,5,7,9-四炔			聚炔类	2345-16-6				C13H8	HH-033.mol
1,3,11-tridecatriene-5,7,9-triyne							1,3,11-十三烷-5,7,9-三炔			聚炔类	124604-44-0				C13H10	HH-034.mol
1,3,5,11-tridecatetraene-7,9-diyne							1,3,5,11-三癸四烯-7,9-二炔			聚炔类	63366-81-4				C13H12	HH-035.mol
1-tridecene-3,5,7,9,11-pentayne							1-烯-3,5,7,9,11-五炔			聚炔类	2060-59-5				C13H6	HH-036.mol
1,3-trideca-diene-5,7,9,11-tetrayne							1,3-丁二烯-5,7,9,11-四炔			聚炔类	18668-88-7				C13H8	HH-037.mol
1-(O-2,4,6-trimethoxyphenyl)-6-(O-galloyl)-β-D-glucopyranoside							1-(O-2,4,6-三甲氧基苯基)-6-(O-没食子酸)-β-D-吡喃葡萄糖甙			聚炔类	83013-65-4				C22H26O13	HH-038.mol
(2E,8E)-12R-tetradecadiene-4,6-diyne-1,12,14-triol							(2E,8E)-12R-四丁二烯-4,六二炔-1,一二三醇-14-三醇			聚炔类	71867-25-9				C14H18O3	HH-039.mol
N-feruloyl-serotonin							N-阿魏羟色胺			亚精胺类	68573-23-9				C20H20N2O4	HH-040.mol
N-p-coumaroyl-serotonin							N-(对-库马洛伊)5-羟色胺			亚精胺类	68573-24-0				C19H18N2O3	HH-041.mol
N-ferruloyltryptamine							N-铁酰色胺			亚精胺类	96014-22-1				C20H20N2O3	HH-042.mol
N-(m-coumaroyl)tryptamine							N-(间香豆素)色胺			亚精胺类					C19H18N2O2	HH-043.mol
N-(p-Coumaroyl)tyramine							N-(对香豆酰基)酪胺			亚精胺类	36417-86-4				C17H17NO3	HH-044.mol
Serotobenine							血清素			亚精胺类	99615-94-8				C20H18N2O4	HH-045.mol
N-[2-(5-Hydroxy-1H-indol-3-yl)ethyl]ferulamide							N-[2-(5-羟基-1H-吲哚-3-)乙基]阿魏酰胺			亚精胺类	193224-22-5				C20H20N2O4	HH-046.mol
2,3,4,9-tetrahydro-1-methy1-1-H-pyrido［3,4-b］indole-3-carboxylic acid;thymine-2-desoxyribo-furanoside							2,3,4,9-四氢-1-甲基-1-H-吡啶〔3,4-b〕吲哚-3-羧酸；胸腺嘧啶-2-脱氧核糖-呋喃糖苷				2506-10-7				C12H14N2	HH-047.mol
Anhydrosafflor yellow B							脱水红花黄色素B			醌式查耳酮类	184840-84-4				C48H52O26	HH-048.mol
Tracheloside							络石苷			黄酮苷类	33464-71-0				C27H34O12	HH-049.mol
Matairesinol - monoglucoside							异罗汉松脂苷			黄酮苷类	34446-06-5				C27H36O11	HH-050.mol
Pinoresinol							松脂酚			木脂素类	487-36-5				C20H22O6	HH-051.mol
(-)-Pinoresinol							(-)-松脂醇			木脂素类	81446-29-9				C20H22O6	HH-052.mol
(-)-Epipinoresinol							(-)-表松脂酚			木脂素类	10061-38-8				C20H22O6	HH-053.mol
Epipinoresinol							表松脂酚			木脂素类	24404-50-0				C20H22O6	HH-054.mol
N1,N5,N10-(Z)-tri-p-cou-maroylspermidine							N1,N5,N10-(Z)-tri-p-栗鼠苷			木脂素类	131086-78-7				C34H37N3O6	HH-055.mol
N1,N5-(Z)-N10-(E)-tri-p-coumaroylspermidine							N1N5-(Z)-N10-(E)-三对香豆素哌啶			木脂素类	131086-78-7				C34H37N3O6	HH-056.mol
Icosane-6,8-diol							二十烷-6,8二醇			烷基二醇类					C20H42O2	HH-057.mol
Tricosane-6,8-diol							三叶草-6,8二醇			烷基二醇类					C23H48O2	HH-058.mol
Pentacosane-6,8-diol							戊烷-6,8-二醇			烷基二醇类					C25H52O2	HH-059.mol
Heptacosane-6,8-diol							七烯-6,8二醇			烷基二醇类	300655-43-0				C20H22O6	HH-060.mol
Octacosane-6,8-diol							二十八烷-6,8-二醇			烷基二醇类	155800-86-5				C28H58O2	HH-061.mol
Nonacosane-6,8-diol							壬烷-6,8-二醇			烷基二醇类	96850-33-8				C29H60O2	HH-062.mol
Triacontane-6,8-diol							三酮-6,8二醇			烷基二醇类	155800-87-6				C30H62O2	HH-063.mol
Hentriacontane-6,8-diol							三十一烷-6,8-二醇			烷基二醇类	155800-88-7				C31H64O2	HH-064.mol
Dotriacontane-6,8-diol							十二烷-6,8二醇			烷基二醇类	155800-89-8				C32H66O2	HH-065.mol
Tritriacontane-6,8-diol							三酮-6,8二醇			烷基二醇类	155800-90-1				C33H68O2	HH-066.mol
Tetratriacontane-6,8-diol							四叔烷-6,,8-二醇			烷基二醇类	155800-91-2				C34H70O2	HH-067.mol
Pentatria-contane-6,8-diol							戊烷-邻,6,8-二醇			烷基二醇类	155800-92-3				C33H68O2	HH-068.mol
Hexatriacontane-6,8-diol							十六烷-6,8-二醇			烷基二醇类	193419-70-4				C36H74O2	HH-069.mol
Octacosane-7,9-doil							二十八烷-7,9-二醇			烷基二醇类	194319-71-5				C28H54O2	HH-071.mol
Triacontane-7,9-diol							三酮-7,9二醇			烷基二醇类	193419-72-6				C32H66O2	HH-072.mol
Dotriacontane-7,9-diol							十二烷-7,9二醇			烷基二醇类	193419-73-7				C32H66O2	HH-073.mol
Tetratriacontane-7,9-doil							四叔烷-7,9二醇			烷基二醇类	193419-74-8				C34H70O2	HH-074.mol
Hexatriacontane-7,9-diol							十六烷7,9-二醇			烷基二醇类	193419-75-9				C36H74O2	HH-075.mol
Heptacosane-8,10-doil							七烯-8,10二醇			烷基二醇类	193419-76-0				C29H56O2	HH-076.mol
Nonacosane-8,10-diol							壬烷-8,10-二醇			烷基二醇类	193419-77-1				C29H60O2	HH-077.mol
Hentriacontane-8,10-diol							三十一烷-8,10-二醇			烷基二醇类	193419-78-2				C31H64O2	HH-078.mol
Tritriacontane-8,10-diol							三叔烷-8,10-二醇			烷基二醇类	193419-79-3				C33H68O2	HH-079.mol
Pentatriacontane-8,10-diol							戊烷-8,10-二醇			烷基二醇类	193419-80-6				C35H72O2	HH-080.mol
lauric acid							月桂酸			有机酸类	143-07-7				C12H24O2	HH-081.mol
Myristic acid							(肉)豆蔻酸			有机酸类	544-63-8				C14H28O2	HH-082.mol
Palmitric acid							棕榈酸			有机酸类	67701-02-4				C16H32O2	HH-083.mol
linolic acid							亚油酸			有机酸类	60-33-3				C18H32O2	HH-084.mol
Stearic acid							硬脂酸,十八酸			有机酸类	57-11-4				C18H36O2	HH-085.mol
Arachidic acid							花生酸			有机酸类	506-30-9				C20H40O2	HH-086.mol
Succinic acid							琥珀酸			有机酸类	110-15-6				C4H6O4	HH-087.mol
(E)-Ferulic acid							阿魏酸			有机酸类	1135-24-6				C10H10O4	HH-088.mol
Isopentanoic acid							异戊酸			有机酸类	503-74-2				C5H10O2	HH-089.mol
Stigmasterol							豆甾醇			甾醇类	83-48-7				C29H48O	HH-090.mol
Campesterol							菜油甾醇			甾醇类	474-62-4				C28H48O	HH-091.mol
Sitosterol							谷甾醇			甾醇类	83-47-6				C29H50O	HH-092.mol
Daucosterol							胡萝卜苷			甾醇类	474-58-8				C35H60O6	HH-093.mol
Cartorimine							卡托里明			其他类					C20H22O6	HH-094.mol
Roseoside							长寿花糖甙			其他类	54835-70-0				C19H30O8	HH-095.mol
Benzyl-O-β-D-glucopyr-anoside							苯甲醇-O-β-D-吡喃葡萄糖苷			其他类	130541-80-9				C24H35NO11	HH-095.mol
Scutellarein							野黄芩素			黄酮类	529-53-3				C15H10O6	HH-096.mol
Hexacosanoic acid							正二十六烷酸			黄酮类	506-46-7				C26H52O	HH-097.mol
4,4-dimethylheptanedioic							4,4-二甲基庚二酸			脂肪酸类	5325-75-7				C9H16O4	HH-098.mol
N-tetratriacont-20,23-dienoic acid							N-四氯化碳-20,23-二烯烃酸			脂肪酸类	1450627-32-3				C34H64O2	HH-099.mol
Vanillic acid							香草酸			酚酸类	121-34-6				C8H8O4	HH-100.mol
Gallic acid							没食子酸			酚酸类	149-91-7				C7H6O5	HH-101.mol
Esculetin							七叶亭			香豆素类	305-01-1				C9H6O4	HH-102.mol
6-hydroxyapigenin-6-O-β-D-glucoside-7-O-β-D-glucuronide							6-羟基芹菜素-6-O-β-D-葡萄糖苷-7- O-β-D-葡萄糖醛酸苷			黄酮类	1146045-40-0				C27H28O17	HH-103.mol
6-methoxykaempferol							6-甲氧基山柰酚			黄酮类	32520-55-1				C16H12O7	HH-104.mol
Syringin							紫丁香苷			黄酮类	118-34-3				C17H24O9	HH-105.mol
Ursolic acid							熊果酸			酚酸类	77-52-1				C30H48O3	HH-106.mol
Citrostadienol							柠黄醇			黄酮醇类	474-40-8				C30H50O	HH-107.mol
Scopoletin							东莨菪内酯			香豆素类	92-61-5				C10H8O4	HH-108.mol
Scutellarin							野黄芩苷			黄酮类	27740-01-8				C21H18O12	HH-109.mol
Crocin							新红花苷			黄酮类	42553-65-1				C44H64O24	HH-110.mol
Hexamine							圣草酚			黄酮类	4049-38-1				C15H12O6	HH-111.mol
Dibenzylbutyrolactone							二苄基丁内酯			其他类	34444-37-6				C20H22O7	HH-112.mol
Syringin of paratetrahydrofuran							骈双四氢呋喃丁香脂素			其他类					C27H38O11	HH-113.mol
Oleic acid							油 酸			有机酸类	112-80-1				C18H34O2	HH-114.mol
linoleic acid							亚油酸			有机酸类	60-33-3				C18H32O2	HH-115.mol
Succinic acid							丁二酸			有机酸类	110-56-6				C4H6O4	HH-116.mol
Glucose							葡萄糖			红花多糖	50-99-7				C6H12O6	HH-117.mol
Xylose							木糖			红花多糖	58-86-6				C5H10O5	HH-118.mol
L-(+)-Arabinose							阿拉伯糖			红花多糖	5328-37-0				C5H10O5	HH-119.mol
Galactose							半乳糖			红花多糖	10257-28-0				C6H12O6	HH-120.mol
Myricetin							杨梅素			黄酮类	529-44-2				C15H10O8	HH-121.mol
Baicalin							黄芩苷			黄酮类	21967-41-9				C21H18O11	HH-122.mol
6-(Aminomethyl)-3-methyl-flavone hydrochloride							6-(氨甲基)-3-甲基黄酮盐酸盐			黄酮类	101442-02-8				C17H16ClNO2	HH-123.mol
6-(Dimethylaminomethyl)-3-methyl-flavone hydrochloride							6-(二甲氨基甲基)-3-甲基黄酮盐酸盐			黄酮类	16146-81-9				C19H20ClNO2	HH-124.mol
3-Methyl-6-morpholinomethyl-flavone hydrochloride							3-甲基-6-吗啉甲基黄酮盐酸盐			黄酮类	16146-83-1				C21H22ClNO3	HH-125.mol
Naringenin							柚皮素			黄酮类	93602-28-9				C15H12O5	HH-126.mol
D-Phenylalanine							D-苯丙氨酸			黄酮类	673-06-3				C9H11NO2	HH-127.mol
6-Hydroxykaempferol-3,6,7-triglucoside							6-羟基山奈酚-3,6,7-三-O-葡萄糖苷			黄酮苷类	145134-62-9				C33H40O22	HH-128.mol
6-Hydroxykaempferol 3-Rutinoside-6-glucoside							6-羟基山奈酚 3-芸香糖-6-葡萄糖苷			黄酮苷类	145134-63-0				C33H40O21	HH-129.mol
6-hydroxykaempferol 3,6-diglucoside							6-羟基山奈酚 3,6-二葡萄糖苷			黄酮苷类	142674-16-6				C27H30O17	HH-130.mol
6-hydroxykaempferol-7-O-β-D-glucoside							6-羟基山柰酚-7-O-β-D-葡萄糖苷			黄酮类					C20H18O12	HH-131.mol
6-hydroxykaempferol-3,6,7-O-β-D-glucoside							6-羟基山柰酚-3,6,7-O-β-D-葡萄糖苷			黄酮类					C34H42O21	HH-132.mol
6-hydroxykaempferol-6,7-O-β-D-glucoside							6-羟基山柰酚-6,7-O-β-D-葡萄糖苷			黄酮类					C27H30O17	HH-133.mol
Kaempferol-3-O-β-D-glucopyranoside							山奈酚-3-O-β-D-葡萄糖苷			黄酮类					C21H20O11	HH-134.mol
kaempferol-3-O-β-rutinoside							山奈酚-3-O-β-芸香糖苷			黄酮类	17650-84-9				C27H30O15	HH-135.mol
Kaempferol-3-O-sophoroside							山奈酚-3-O-槐糖苷			黄酮类	19895-95-5				C27H30O16	HH-136.mol
Kaempferol-3-O-β-D-xyloside							山奈酚-3-O-β-D-木糖苷			黄酮类	99882-10-7				C20H18O10	HH-137.mol
Kaempferol 3-O-β-D-allopyranoside							山奈酚-3-O-β-D-别嘌呤苷			黄酮类	69292-77-9				C21H20O11	HH-138.mol
Kaempferol-3-O-D-galactoside							山奈酚-3-O-D-半乳糖苷			黄酮类	107163-34-8				C21H20O11	HH-139.mol
Quercetin-3,7-O-β-D-glucopyranoside							槲皮素-3,7-O-β-D-葡萄糖苷			黄酮类					C27H30O17	HH-140.mol
6-hydroxyapigenin							6-羟基芹菜素			黄酮类	529-53-3				C15H10O6	HH-141.mol
6-hydroxyapigenin-3,6-二-O-β-D-Glucoside							6-羟基芹菜素基-3,6-二-O-β-D-葡萄糖苷			黄酮类					C27H30O17	HH-142.mol
5,7-dihydroxy-4'-Methoxyflavone-7-o-d-apigenin(1→6)-O-β-D-Glucoside							5,7-二羟基-4'甲氧基黄酮-7-O-β-D-芹糖(1→6)-O-β-D-葡萄糖苷			黄酮类					C15H10O6	HH-143.mol
5,6,7,4'-Tetrahydroxyflavanes-6,7-二-O-β-D-Glucoside							5,6,7,4'-四羟基黄烷-6,7-二-O-β-D-葡萄糖苷			黄酮类					C27H32O16	HH-144.mol
(2R)-4',5-dihydroxyl-6,7-di-O-β-D-giucopyanosyl flavanone							(2R)-4',5-二羟基-6,7-di-O-β-D-黄烷酮			黄酮类					C27H32O16	HH-145.mol
(2S)-4',5-dihydroxyl-6,7-di-O-β-D-giucopyanosyl flavanone							(2S)-4',5-二羟基-6,7-di-O-β-D-黄烷酮			黄酮类					C27H32O16	HH-146.mol
Saffloquinoside A							红花藜苷 A			查尔酮类					C27H30O15	HH-147.mol
Saffloquinoside B							红花藜苷 B			查尔酮类					C33H36O17	HH-148.mol
Saffloquinoside D							红花藜苷 D			查尔酮类					C27H34O18	HH-149.mol
Yellow pigment A							黄色素 A			查尔酮类					C26H28O16	HH-150.mol
Tinctormine							酊剂			查尔酮类	149475-43-4				C9H12N6O4S	HH-151.mol
Saffloquinoside C							红花藜苷 C			查尔酮类					C27H32O17	HH-152.mol
Saffomin C							红花素 C			查尔酮类					C30H30O15	HH-153.mol
Saffloquinoside E							红花藜苷 E			查尔酮类					C30H34O15	HH-154.mol

## Sheet: XD
Item Name	Item Type	IUPAC name	Description		ccs	rccs	Synonym "Chinese Name"	Synonym "Drug Bank"	Synonym "ChemSpider"	Category	Synonym "CAS number"	Item Tag "Waters Screening Library/Pesticide"	Item Tag "Waters Screening Library/Veterinary Drug"	Item Tag "Waters Screening Library/Mycotoxin"	Formula	Structure	Adduct	Retention Time	F1	F2	F3	F4	F5	DriftTime	Comment
Giganteaside D							巨头刺草皂苷D			三萜皂苷					C30H48O4	XD-001.mol
Cauloside A							葳岩仙皂苷A			三萜皂苷	17184-21-3				C35H56O8	XD-002.mol
Asperosaponin VI							川续断皂苷Ⅵ			三萜皂苷	39524-08-8				C47H76O18	XD-003.mol
Kalopanaxsaponin A							α-常春藤皂苷			三萜皂苷	27013-91-8				C41H66O12	XD-004.mol
Dipsacussaponin C										三萜皂苷	152406-43-4				C64H104O30	XD-005.mol
Dipsacussaponin B										三萜皂苷	152406-42-3				C59H96O25	XD-006.mol
Dipsacussaponin A										三萜皂苷					C42H68O14	XD-007.mol
Macranthoidin A							灰毡毛忍冬皂苷甲			三萜皂苷	140360-29-8				C59H96O27	XD-008.mol
Macranthoside B							灰毡毛忍冬次皂苷乙			三萜皂苷	146100-02-9				C53H86O22	XD-009.mol
Dipsacobioside										三萜皂苷	123350-57-2				C41H66O12	XD-010.mol
Akebiasaponin D							木通皂苷 D			三萜皂苷	39524-08-8				C47H76O18	XD-011.mol
Cantleyoside							茶茱萸苷			环烯醚萜	32455-46-2				C33H46O19	XD-012.mol
Sweroside							当药苷			环烯醚萜	14215-86-2				C16H22O9	XD-013.mol
Loganin							马钱子苷			环烯醚萜	18524-94-2				C17H26O10	XD-014.mol
Ursolicacid							熊果酸			环烯醚萜	77-52-1				C30H48O3	XD-015.mol
Sylvestroside III							林生续断苷Ⅲ			环烯醚萜	71431-24-8				C27H36O14	XD-016.mol
Gentianine							龙胆碱			生物碱	439-89-4				C10H9NO2	XD-017.mol
Cantleyine							坎特莱茵碱			生物碱	30333-81-4				C11H13NO3	XD-018.mol
Venoterpine							喜树碱			生物碱	17948-42-4				C9H11NO	XD-019.mol
2,4,6-trimethyl phenol							2,4,6-三甲基苯酚			挥发油	527-60-6				C9H12O	XD-020.mol
Pentacosanoic Acid							正二十五烷酸				506-38-7				C25H50O2	XD-021.mol
Dotriacontanoic Acid							正三十二烷酸				3625-52-3				C32H64O2	XD-022.mol
sucrose							蔗糖				57-50-1				C12H22O11	XD-023.mol
β-sitosterol							β-谷甾醇				83-46-5				C29H50O	XD-024.mol
Daucosterol							胡罗卜苷			苷类	474-58-8				C35H60O6	XD-025.mol
3,4-di-O-caffeoylquinic acid							3,4-二咖啡酰奎宁酸				14534-61-3				C25H24O12	XD-026.mol
methyl3,4-di-O-caffeoyl quinate							3,4-O-二咖啡酰基奎宁酸甲酯								C26H26O12	XD-027.mol
3,5-di-O-caffeoylquinic acid							(-)-3,5-二咖啡酰奎宁酸				2450-53-5				C25H24O12	XD-028.mol
methyl3,5-di-O-caffeoyl quinate							3,5-O-二咖啡酰基奎宁酸甲酯				159934-13-1				C26H26O12	XD-029.mol
4,5 -di-O-caffeoylquinic acid							异绿原酸C			黄酮类	57378-72-0				C25H24O12	XD-030.mol
methyl 4,5-di-O-caffeoyl quinate							4,5-O-二咖啡酰基奎宁酸甲酯				188742-80-5				C26H26O12	XD-031.mol
Dipsaicin							酚酸葡苷			苷类					C14H18O9	XD-032.mol
hederagenin							常春藤皂苷元			皂苷类	465-99-6				C30H48O4	XD-033.mol
oleanolic acid							齐墩果酸			萜类	508-02-1				C30H48O3	XD-034.mol
Ethyl propionate							丙酸乙酯			挥发油	105-37-3				C5H10O2	XD-035.mol
Toluene							甲苯			挥发油	108-88-4				C7H8	XD-036.mol
Diisobutyl ether							异丁醚			挥发油	628-55-7				C8H18O	XD-037.mol
α-Pinene							α-蒎烯			挥发油	7785-70-8				C10H16	XD-038.mol
β-Pinene							β-蒎烯			挥发油	127-91-3				C10H16	XD-039.mol
2,3-Heptadien-5-yne,2,4-dimethyl-										挥发油	41898-89-9				C9H12	XD-040.mol
phenol							苯酚			挥发油	108-95-2				C6H6O	XD-041.mol
phenol,2-methyl-							邻甲酚			挥发油	95-48-7				C7H8O	XD-042.mol
Naphthalene							萘			挥发油	91-20-3				C10H8	XD-043.mol
Benzene,1,2-dimethoxy-4-ethyl							1,2-二甲氧基-4-乙基苯			挥发油	5888-51-7				C10H14O2	XD-044.mol
phenol,2,4-dimethyl-nonyl										挥发油	85665-77-6				C17H28O	XD-045.mol
Dibenzofuran							二苯并呋喃			挥发油	132-64-9				C12H8O	XD-046.mol
9H-Fluorene							芴			挥发油	86-73-7				C13H10	XD-047.mol
Carvotanaceton							5-异丙基-2-甲基-2-环己烯-1-酮			挥发油	43205-82-9				C10H16O	XD-048.mol
Heptadecane							十七烷			挥发油	629-78-7				C17H36	XD-049.mol
phenanthrene							菲			挥发油					C14H10	XD-050.mol
6,9-Octadecadiynoic acid methyl ester										挥发油	56847-03-1				C19H30O2	XD-051.mol
Bicyclo 2 2 2 oct-2-ene										挥发油	106562-31-6				C11H18	XD-052.mol
2'-Hydroxy-4'-methoxyacetophenone							丹皮酚			挥发油	552-41-0				C9H10O3	XD-053.mol
Ursolic Acid							乌苏酸			挥发油	77-52-1				C30H48O3	XD-054.mol
demethylsecologanol										挥发油					C16H24O10	XD-055.mol
(+)-Piresil-4-O-beta-D-glucopyraside							(+)-1-羟基松脂醇 4'-O-β-D-吡喃葡萄糖苷			挥发油					C26H32O13	XD-056.mol
2-Methyl- 3-propyloxirane							trans-2-甲基-3-丙基环氧乙烷			挥发油					C6H12O	XD-057.mol
Benzaldehyde							苯甲醛			挥发油	100-52-7				C7H6O	XD-058.mol
2-Amylfuran							2-戊基呋喃			挥发油	3777-69-3				C9H14O	XD-059.mol
Cineole							桉叶油素			挥发油	470-82-6				C10H18O	XD-060.mol
Phenylacetaldehyde							苯乙醛			挥发油	122-78-1				C8H8O	XD-061.mol
2-Methylphenol							2-甲基苯酚			挥发油	95-48-7				C7H8O	XD-062.mol
3-Methylphenol							3-甲基苯酚			挥发油	108-39-4				C7H8O	XD-063.mol
4-Methylphenol							4-甲基苯酚			挥发油	106-44-5				C7H8O	XD-064.mol
β-Linalool							β-芳樟醇			挥发油	78-70-6				C10H18O	XD-065.mol
Nonanal							壬荃			挥发油	124-19-6				C9H18O	XD-066.mol
Carveol							香芹醇			挥发油	99-48-9				C10H16O	XD-067.mol
2,4-Dimethylphenol							2,4-二甲基苯酚			挥发油	105-67-9				C8H10O	XD-068.mol
(+)-α-Terpineol							α,α,4-三甲基-3-环己烯-1-醇			挥发油	7785-53-7				C10H18O	XD-069.mol
3-ethyl-5-methylphenol							3-乙基-5-甲基苯酚			挥发油	698-71-5				C9H12O	XD-070.mol
2-ethyl-4-methylphenol							2-乙基-4-甲基苯酚			挥发油	3855-26-3				C9H12O	XD-071.mol
9-Fluorenone							9-芴酮			挥发油	486-25-9				C13H8O	XD-072.mol
2,4-Decadienal							2,4-癸二烯醛			挥发油	2363-88-4				C10H16O	XD-073.mol
Myristoleic acid							肉豆蔻脑酸			挥发油	544-64-9				C14H26O2	XD-074.mol
β-Damascenone							β-大马士革酮			挥发油	23726-93-4				C13H18O	XD-075.mol
α-selinene							α-芹子烯			挥发油	473-13-2				C15H24	XD-076.mol
Agarospirol							苍术醇			挥发油	23811-08-7				C15H26O	XD-077.mol
9-Methylnonadecane							9-甲基十九碳烷			挥发油					C20H42	XD-078.mol
2,4,6-Tri-tert-butylphenol							2,4,6-三叔丁基苯酚			挥发油	732-26-3				C18H30O	XD-079.mol
Caryophyllene oxide							石竹烯氧化物			挥发油	1139-30-6				C15H24O	XD-080.mol
(+)-Cedrol							雪松醇			挥发油	77-53-2				C15H26O	XD-081.mol
Patchouli alcohol							广藿香醇			挥发油	5986-55-0				C15H26O	XD-082.mol
Phytol							植醇			挥发油	150-86-7				C20H40O	XD-083.mol
n-Docosane							二十二碳烷			挥发油	629-97-0				C22H46	XD-084.mol
Tricosane							二十三碳烷			挥发油	638-67-5				C23H48	XD-085.mol
11-benzylhenicosane							11-辛基-二十一烷			挥发油					C29H60	XD-086.mol
11-Decyltetracosane							11-癸基-二十四烷			挥发油	55429-84-0				C34H70	XD-087.mol
Linoleic acid							（Z,Z）-9,12-十八烷二烯酸			挥发油	60-33-3				C18H32O2	XD-088.mol
Loganic acid							马钱酸				22255-40-9				C16H24O10	XD-089.mol
Chlorogenic acid							绿原酸			酚酸类	327-97-9				C16H18O9	XD-090.mol
caffeic acid							咖啡酸				331-39-5				C9H8O4	XD-091.mol
Sylvestroside I							林生续断苷Ⅰ			环烯醚萜苷类	71431-22-6				C33H48O19	XD-092.mol
Sylvestroside Ⅱ							林生续断苷Ⅱ			环烯醚萜苷类					C35H50O20	XD-093.mol
Triplostoside A							大花双参甙 A								C35H52O20	XD-094.mol
Dipsacus saponin A							川续断皂苷A			皂苷类					C42H68O14	XD-095.mol
Dipsacoside B							川续断皂苷B			皂苷类	33289-85-9				C53H86O22	XD-096.mol
Dipsanoside A							续断苷A			苷类	889678-62-0				C66H90O37	XD-097.mol
Dipsanoside C							续断苷C			苷类	1013120-44-9				C36H52O21	XD-098.mol
Dipsanoside D							续断苷D			苷类	1013120-46-1				C36H52O21	XD-099.mol
Dipsanoside E							续断苷E			苷类	1012326-81-6				C36H52O21	XD-100.mol
Dipsanoside F							续断苷F			苷类	1012326-82-7				C36H52O21	XD-101.mol
Dipsanoside G							续断苷G			苷类	1013120-48-3				C29H44O15	XD-102.mol
Japondipsaponin E1							日本续断皂苷E1			皂苷类					C59H96O26	XD-103.mol
2,6-Dihydroxycinnamic acid							2,6-二羟基桂皮酸								C9H8O4	XD-104.mol
Secologanin							裂马钱子苷			苷类	19351-63-4				C17H24O10	XD-105.mol
Akebia saponin PA							木通皂苷 PA			皂苷类					C35H56O8	XD-106.mol
Laciniatoside VI											152408-82-7				C28H40O15	XD-107.mol
Laciniatoside V											120416-05-9				C27H38O14	XD-108.mol

[truncated: 6 more sheets: SD-1, SD-2, GSB, GZ, YYH, WLX]
